# Supplementary material for: Systemic Immunomodulatory Treatments for Atopic Dermatitis: Update of a Living Systematic Review and Network Meta-analysis
Source: PubMed Central journal article supplement (PMC8928094; doi:10.1001/jamadermatol.2022.0455), 2022-03-16
Supplement: jamadermatol-e220455-s001.pdf [file jamadermatol-e220455-s001.pdf]

## Supplemental Online Content

Drucker AM, Morra DE, Prieto-Merino D, et al. Systemic immunomodulatory treatments for atopic dermatitis: update of a living systematic review and network meta-analysis. *JAMA Dermatol*. March 16, 2022. doi:10.1001/jamadermatol.2022.0455

- eTable 1.** Risk of bias assessment for new studies added since baseline review
- eTable 2.** League table for change in EASI
- eTable 3.** GRADE certainty ratings for change in EASI
- eTable 4.** League table for change in POEM
- eTable 5.** GRADE certainty ratings for change in POEM
- eTable 6.** League table for change in DLQI
- eTable 7.** GRADE certainty ratings for change in DLQI
- eTable 8.** League table for change in PP-NRS
- eTable 9.** GRADE certainty ratings for change in PP-NRS
- eFigure 1.** Network graphs for change in signs on the standardized mean difference scale
- eTable 10.** League table for change in signs on the standardized mean difference scale
- eTable 11.** GRADE certainty ratings for change in signs on the standardized mean difference scale
- eFigure 2.** Network graphs of change in QoL on the standardized mean difference scale
- eTable 12.** League table for change in QoL on the standardized mean difference scale
- eTable 13.** GRADE certainty ratings for change in QoL on the standardized mean difference scale
- eFigure 3.** Network graphs of change in itch on the standardized mean difference scale
- eTable 14.** League table for change in itch on the standardized mean difference scale
- eTable 15.** GRADE certainty ratings for change in itch on the standardized mean difference scale
- eFigure 4.** Network graphs for withdrawal due to adverse events
- eTable 16.** League table for withdrawal due to adverse events
- eTable 17.** GRADE certainty ratings for withdrawal due to adverse events
- eFigure 5.** Network graphs for serious adverse events
- eTable 18.** League table for serious adverse events
- eTable 19.** GRADE certainty ratings for serious adverse events
- eReferences**

This supplemental material has been provided by the authors to give readers additional information about their work.



**eTable 1.** Risk of bias assessment for new studies added since baseline review

|                                                        | Random sequence generation | Allocation concealment | Blinding of participants and personnel | Blinding of outcome assessment | Incomplete outcome data | Selective reporting | Other bias |
|--------------------------------------------------------|----------------------------|------------------------|----------------------------------------|--------------------------------|-------------------------|---------------------|------------|
| Chan UK 2020 <sup>1</sup>                              | Low                        | Low                    | Low                                    | Low                            | Low                     | Low                 | Low        |
| Simpson 2020 BREEZE-AD 1 <sup>2</sup>                  | Unclear                    | Low                    | Low                                    | Low                            | Unclear                 | Low                 | Low        |
| Simpson 2020 BREEZE-AD 2 <sup>2</sup>                  | Unclear                    | Low                    | Low                                    | Low                            | Unclear                 | Low                 | Low        |
| Simpson USA 2020 Abrocitinib/ NCT03349060 <sup>3</sup> | Low                        | Low                    | Low                                    | Low                            | Low                     | Low                 | Low        |
| Guttman-Yassky USA 2020 Lebrikizumab <sup>4</sup>      | Unclear                    | Low                    | Low                                    | Low                            | Unclear                 | Low                 | Low        |
| Paller USA 2020 Dupilumab <sup>5</sup>                 | Low                        | Low                    | Low                                    | Low                            | Low                     | Low                 | Low        |
| Reich Germany 2020 (BREEZE-AD7) <sup>6</sup>           | Low                        | Low                    | Low                                    | Low                            | Low                     | Low                 | Low        |
| Silverberg USA 2020 (ECZTRA3) <sup>7</sup>             | Low                        | Low                    | Low                                    | Low                            | Low                     | Low                 | Low        |
| Wollenberg Germany 2020 (ECZTRA1) <sup>8</sup>         | Low                        | Low                    | Low                                    | Low                            | Low                     | Low                 | Low        |
| Wollenberg Germany 2020 (ECZTRA2) <sup>8</sup>         | Low                        | Low                    | Low                                    | Low                            | Low                     | Low                 | Low        |
| Kabashima Japan 2020 <sup>9</sup>                      | Unclear                    | Low                    | Low                                    | Low                            | Low                     | Low                 | Low        |
| Silverberg USA 2020 (JADE MONO-2) <sup>10</sup>        | Low                        | Low                    | Low                                    | Low                            | Unclear                 | Low                 | Low        |
| Simpson 2021 (BREEZE-AD5) <sup>11</sup>                | Low                        | Low                    | Low                                    | Low                            | High                    | Low                 | Low        |
| NCT03428100 (BREEZE-AD4) <sup>12</sup>                 | Low                        | Low                    | Low                                    | Low                            | Unclear                 | Low                 | Low        |
| NCT03720470 (JADE Compare) <sup>13</sup>               | Low                        | Low                    | Low                                    | Low                            | Low                     | Low                 | Low        |
| NCT03912259 <sup>14</sup>                              | Low                        | Low                    | Low                                    | Low                            | Low                     | Low                 | Low        |
| NCT03796676 (JADE TEEN) <sup>15</sup>                  | Low                        | Low                    | Low                                    | Low                            | Low                     | Low                 | Low        |
| Guttman USA 2021 (MEASURE UP 1) <sup>16</sup>          | Low                        | Low                    | Low                                    | Low                            | Unclear                 | Low                 | Low        |

|                                                  |     |     |     |     |         |         |     |
|--------------------------------------------------|-----|-----|-----|-----|---------|---------|-----|
| Guttman USA 2021<br>(MEASURE UP 2) <sup>16</sup> | Low | Low | Low | Low | Unclear | Low     | Low |
| Reich Germany 2021<br>(AD Up) <sup>17</sup>      | Low | Low | Low | Low | Unclear | Unclear | Low |
| Merola USA 2021<br>(ECZTRA5) <sup>18</sup>       | Low | Low | Low | Low | Low     | Low     | Low |

**eTable 2.** League table with relative effect estimates for change in EASI up to 16 weeks of treatment in adults for placebo and medications used in clinical practice or likely to be approved soon. Results for other pairwise comparisons in the network can be requested from the authors. Results are presented as change in EASI (95% CrI). A positive effect estimate in a given cell favors the row-defining treatment. A negative effect estimate in a given cell favors the column-defining treatment. The bottom row contains the Surface Under the Cumulative Ranking (SUCRA) value for the column-defining treatment.

|                                                   | Abrocitinib<br>100 mg daily | Abrocitinib<br>200 mg daily | Baricitinib 2<br>mg daily | Baricitinib 4<br>mg daily | Dupilumab<br>600 mg then<br>300 mg q2<br>weeks | Placebo          | Tralokinumab<br>600 mg then<br>300 mg q2<br>weeks | Upadacitinib<br>15 mg daily | Upadacitinib<br>30 mg daily |
|---------------------------------------------------|-----------------------------|-----------------------------|---------------------------|---------------------------|------------------------------------------------|------------------|---------------------------------------------------|-----------------------------|-----------------------------|
| Abrocitinib<br>100 mg daily                       |                             | -4.3 (-6, -2.7)             | 3.1 (0.5, 5.6)            | 1.1 (-1.6, 3.7)           | -2.1 (-4.1, -0.3)                              | 8.6 (6.9, 10.3)  | 1.4 (-1.1, 3.9)                                   | -2.3 (-4.7, -0.1)           | -4.9 (-7.2, -2.6)           |
| Abrocitinib<br>200 mg daily                       | 4.3 (2.7, 6)                |                             | 7.4 (4.8, 9.9)            | 5.4 (2.7, 8)              | 2.2 (0.2, 4)                                   | 13 (11.3, 14.7)  | 5.7 (3.2, 8.2)                                    | 2 (-0.3, 4.3)               | -0.6 (-2.9, 1.7)            |
| Baricitinib<br>2 mg daily                         | -3.1 (-5.6, -0.5)           | -7.4 (-9.9, -4.8)           |                           | -2 (-4.1, 0.1)            | -5.2 (-7.5, -2.9)                              | 5.6 (3.7, 7.5)   | -1.7 (-4.3, 1)                                    | -5.4 (-7.9, -2.9)           | -7.9 (-10.4, -5.5)          |
| Baricitinib<br>4 mg daily                         | -1.1 (-3.7, 1.6)            | -5.4 (-8, -2.7)             | 2 (-0.1, 4.1)             |                           | -3.2 (-5.7, -0.8)                              | 7.6 (5.5, 9.6)   | 0.3 (-2.4, 3)                                     | -3.4 (-6, -0.8)             | -5.9 (-8.5, -3.4)           |
| Dupilumab<br>600 mg then<br>300 mg q2<br>weeks    | 2.1 (0.3, 4.1)              | -2.2 (-4, -0.2)             | 5.2 (2.9, 7.5)            | 3.2 (0.8, 5.7)            |                                                | 10.8 (9.5, 12.2) | 3.5 (1.3, 5.8)                                    | -0.2 (-2.2, 1.9)            | -2.7 (-4.7, -0.6)           |
| Placebo                                           | -8.6 (-10.3, -6.9)          | -13 (-14.7, -11.3)          | -5.6 (-7.5, -3.7)         | -7.6 (-9.6, -5.5)         | -10.8 (-12.2, -9.5)                            |                  | -7.3 (-9.1, -5.4)                                 | -11 (-12.5, -9.5)           | -13.5 (-15.1, -12)          |
| Tralokinumab<br>600 mg then<br>300 mg q2<br>weeks | -1.4 (-3.9, 1.1)            | -5.7 (-8.2, -3.2)           | 1.7 (-1, 4.3)             | -0.3 (-3, 2.4)            | -3.5 (-5.8, -1.3)                              | 7.3 (5.4, 9.1)   |                                                   | -3.7 (-6.1, -1.4)           | -6.3 (-8.6, -3.9)           |
| Upadacitinib<br>15 mg daily                       | 2.3 (0.1, 4.7)              | -2 (-4.3, 0.3)              | 5.4 (2.9, 7.9)            | 3.4 (0.8, 6)              | 0.2 (-1.9, 2.2)                                | 11 (9.5, 12.5)   | 3.7 (1.4, 6.1)                                    |                             | -2.5 (-4, -1)               |
| Upadacitinib<br>30 mg daily                       | 4.9 (2.6, 7.2)              | 0.6 (-1.7, 2.9)             | 7.9 (5.5, 10.4)           | 5.9 (3.4, 8.5)            | 2.7 (0.6, 4.7)                                 | 13.5 (12, 15.1)  | 6.3 (3.9, 8.6)                                    | 2.5 (1, 4)                  |                             |
| SUCRA                                             | 0.76                        | 0.94                        | 0.55                      | 0.70                      | 0.86                                           | 0.11             | 0.68                                              | 0.87                        | 0.95                        |

**eTable 3.** GRADE certainty ratings for change in EASI up to 16 weeks of treatment in adults for placebo and medications used in clinical practice or likely to be approved soon. Results are presented as change in EASI (95% CrI). Negative effect estimates favor the treatment listed in the intervention column; positive effect estimates favor the comparator.

| Intervention             | Comparator               | Head-to-head trials, n | Direct estimate (95% CrI); Certainty of Evidence | Indirect estimate (95% CrI); Certainty of Evidence | NMA Estimate (95% CrI); Certainty of Evidence |
|--------------------------|--------------------------|------------------------|--------------------------------------------------|----------------------------------------------------|-----------------------------------------------|
| Abrocitinib 100 mg daily | Abrocitinib 200 mg daily | 4                      | 4.3 (2.7, 6); high                               | --                                                 | 4.3 (2.7, 6); high                            |
| Abrocitinib 100 mg daily | Baricitinib 2 mg daily   | 0                      | --                                               | -3.1 (-5.6, -0.5); high                            | -3.1 (-5.6, -0.5); high                       |
| Abrocitinib 100 mg daily | Baricitinib 4 mg daily   | 0                      | --                                               | -1.1 (-3.7, 1.6); high                             | -1.1 (-3.7, 1.6); moderate <sup>a</sup>       |
| Abrocitinib 100 mg daily | Dupilumab                | 1                      | 0.6 (-1.9, 3.0); high                            | 3.9 (1.4, 6.6); high                               | 2.1 (0.3, 4.1); high                          |
| Abrocitinib 100 mg daily | Placebo                  | 4                      | -8.6 (-10.3, -6.9); high                         | --                                                 | -8.6 (-10.3, -6.9); high                      |
| Abrocitinib 100 mg daily | Tralokinumab             | 0                      | --                                               | -1.4 (-3.9, 1.1); high                             | -1.4 (-3.9, 1.1); moderate <sup>a</sup>       |
| Abrocitinib 100 mg daily | Upadacitinib 15 mg daily | 0                      | --                                               | 2.3 (0.1, 4.7); high                               | 2.3 (0.1, 4.7); high                          |
| Abrocitinib 100 mg daily | Upadacitinib 30 mg daily | 0                      | --                                               | 4.9 (2.6, 7.2); high                               | 4.9 (2.6, 7.2); high                          |
| Abrocitinib 200 mg daily | Baricitinib 2 mg daily   | 0                      | --                                               | -7.4 (-9.9, -4.8); high                            | -7.4 (-9.9, -4.8); high                       |
| Abrocitinib 200 mg daily | Baricitinib 4 mg daily   | 0                      | --                                               | -5.4 (-8, -2.7); high                              | -5.4 (-8, -2.7); high                         |
| Abrocitinib 200 mg daily | Dupilumab                | 1                      | -3.0 (-5.4, -0.5); high                          | -1.3 (-3.8, 1.3); high                             | -2.2 (-4, -0.2); high                         |
| Abrocitinib 200 mg daily | Placebo                  | 4                      | -13 (-14.7, -11.3); high                         | --                                                 | -13 (-14.7, -11.3); high                      |
| Abrocitinib 200 mg daily | Tralokinumab             | 0                      | --                                               | -5.7 (-8.2, -3.2); high                            | -5.7 (-8.2, -3.2); high                       |
| Abrocitinib 200 mg daily | Upadacitinib 15 mg daily | 0                      | --                                               | -2 (-4.3, 0.3); high                               | -2 (-4.3, 0.3); moderate <sup>a</sup>         |
| Abrocitinib 200 mg daily | Upadacitinib 30 mg daily | 0                      | --                                               | 0.6 (-1.7, 2.9); high                              | 0.6 (-1.7, 2.9); high                         |
| Baricitinib 2 mg daily   | Baricitinib 4 mg daily   | 4                      | 2 (-0.1, 4.1); moderate*                         | --                                                 | 2 (-0.1, 4.1); low <sup>a</sup>               |
| Baricitinib 2 mg daily   | Dupilumab                | 0                      | --                                               | 5.2 (2.9, 7.5); high                               | 5.2 (2.9, 7.5); high                          |
| Baricitinib 2 mg daily   | Placebo                  | 5                      | -5.6 (-7.5, -3.7); high                          | --                                                 | -5.6 (-7.5, -3.7); high                       |
| Baricitinib 2 mg daily   | Tralokinumab             | 0                      | --                                               | 1.7 (-1, 4.3); high                                | 1.7 (-1, 4.3); moderate <sup>a</sup>          |

|                          |                          |   |                           |                         |                           |
|--------------------------|--------------------------|---|---------------------------|-------------------------|---------------------------|
| Baricitinib 2 mg daily   | Upadacitinib 15 mg daily | 0 | --                        | 5.4 (2.9, 7.9); high    | 5.4 (2.9, 7.9); high      |
| Baricitinib 2 mg daily   | Upadacitinib 30 mg daily | 0 | --                        | 7.9 (5.5, 10.4); high   | 7.9 (5.5, 10.4); high     |
| Baricitinib 4 mg daily   | Dupilumab                | 0 | --                        | 3.2 (0.8, 5.7); high    | 3.2 (0.8, 5.7); high      |
| Baricitinib 4 mg daily   | Placebo                  | 4 | -7.6 (-9.6, -5.5); high   | --                      | -7.6 (-9.6, -5.5); high   |
| Baricitinib 4 mg daily   | Tralokinumab             | 0 | --                        | -0.3 (-3, 2.4); high    | -0.3 (-3, 2.4); high      |
| Baricitinib 4 mg daily   | Upadacitinib 15 mg daily | 0 | --                        | 3.4 (0.8, 6); high      | 3.4 (0.8, 6); high        |
| Baricitinib 4 mg daily   | Upadacitinib 30 mg daily | 0 | --                        | 5.9 (3.4, 8.5); high    | 5.9 (3.4, 8.5); high      |
| Dupilumab                | Placebo                  | 7 | -10.8 (-12.2, -9.5); high | --                      | -10.8 (-12.2, -9.5); high |
| Dupilumab                | Tralokinumab             | 0 | --                        | -3.5 (-5.8, -1.3); high | -3.5 (-5.8, -1.3); high   |
| Dupilumab                | Upadacitinib 15 mg daily | 0 | --                        | 0.2 (-1.9, 2.2); high   | 0.2 (-1.9, 2.2); high     |
| Dupilumab                | Upadacitinib 30 mg daily | 0 | --                        | 2.7 (0.6, 4.7); high    | 2.7 (0.6, 4.7); high      |
| Tralokinumab             | Upadacitinib 15 mg daily | 0 | --                        | 3.7 (1.4, 6.1); high    | 3.7 (1.4, 6.1); high      |
| Tralokinumab             | Upadacitinib 30 mg daily | 0 | --                        | 6.3 (3.9, 8.6); high    | 6.3 (3.9, 8.6); high      |
| Tralokinumab             | Placebo                  | 3 | -7.3 (-9.1, -5.4); high   | --                      | -7.3 (-9.1, -5.4); high   |
| Upadacitinib 15 mg daily | Upadacitinib 30 mg daily | 4 | 2.5 (1, 4); high          | --                      | 2.5 (1, 4); high          |
| Upadacitinib 15 mg daily | Placebo                  |   | -11 (-12.5, -9.5); high   | --                      | -11 (-12.5, -9.5); high   |
| Upadacitinib 30 mg daily | Placebo                  |   | -13.5 (-15.1, -12); high  | --                      | -13.5 (-15.1, -12); high  |

Dose of dupilumab and tralokinumab is 600 mg then 300 mg every 2 weeks

The network meta-analysis certainty ratings start at the higher of the direct or indirect ratings and can then be rated down further for incoherence (based on the results of node splitting analyses) and imprecision.

\* Rated down for inconsistency

a. Rated down for imprecision

**eTable 4.** League table with relative effect estimates for change in POEM up to 16 weeks of treatment in adults for placebo and medications used in clinical practice or likely to be approved soon. Results for other pairwise comparisons in the network can be requested from the authors. Results are presented as change in POEM (95% CrI). A positive effect estimate in a given cell favors the row-defining treatment. A negative effect estimate in a given cell favors the column-defining treatment. The bottom row contains the Surface Under the Cumulative Ranking (SUCRA) value for the column-defining treatment.

|                                                   | Abrocitinib<br>100 mg daily | Abrocitinib<br>200 mg daily | Baricitinib 2<br>mg daily | Baricitinib 4<br>mg daily | Dupilumab<br>600 mg then<br>300 mg q2<br>weeks | Placebo          | Tralokinumab<br>600 mg then<br>300 mg q2<br>weeks | Upadacitinib<br>15 mg daily | Upadacitinib<br>30 mg daily |
|---------------------------------------------------|-----------------------------|-----------------------------|---------------------------|---------------------------|------------------------------------------------|------------------|---------------------------------------------------|-----------------------------|-----------------------------|
| Abrocitinib<br>100 mg daily                       |                             | -3.2 (-4.2, -2.2)           | 1.2 (-0.4, 2.7)           | -0.5 (-2.1, 1.1)          | -2.3 (-3.5, -1.2)                              | 5 (3.9, 6)       | 0.4 (-1.1, 1.8)                                   | -2 (-6.3, 2.2)              | -5.6 (-10, -1.5)            |
| Abrocitinib<br>200 mg daily                       | 3.2 (2.2, 4.2)              |                             | 4.4 (2.9, 5.9)            | 2.7 (1.2, 4.3)            | 0.9 (-0.2, 2)                                  | 8.2 (7.1, 9.2)   | 3.6 (2.1, 5)                                      | 1.2 (-3, 5.4)               | -2.4 (-6.7, 1.7)            |
| Baricitinib<br>2 mg daily                         | -1.2 (-2.7, 0.4)            | -4.4 (-5.9, -2.9)           |                           | -1.6 (-2.8, -0.5)         | -3.5 (-4.8, -2.2)                              | 3.8 (2.6, 4.9)   | -0.8 (-2.3, 0.7)                                  | -3.2 (-7.5, 1.1)            | -6.8 (-11.1, -2.6)          |
| Baricitinib<br>4 mg daily                         | 0.5 (-1.1, 2.1)             | -2.7 (-4.3, -1.2)           | 1.6 (0.5, 2.8)            |                           | -1.9 (-3.2, -0.5)                              | 5.4 (4.2, 6.6)   | 0.8 (-0.7, 2.4)                                   | -1.5 (-5.8, 2.8)            | -5.2 (-9.5, -1)             |
| Dupilumab<br>600 mg then<br>300 mg q2<br>weeks    | 2.3 (1.2, 3.5)              | -0.9 (-2, 0.2)              | 3.5 (2.2, 4.8)            | 1.9 (0.5, 3.2)            |                                                | 7.3 (6.6, 8)     | 2.7 (1.5, 3.9)                                    | 0.3 (-3.9, 4.5)             | -3.3 (-7.6, 0.8)            |
| Placebo                                           | -5 (-6, -3.9)               | -8.2 (-9.2, -7.1)           | -3.8 (-4.9, -2.6)         | -5.4 (-6.6, -4.2)         | -7.3 (-8, -6.6)                                |                  | -4.6 (-5.6, -3.6)                                 | -7 (-11.1, -2.9)            | -10.6 (-14.8, -6.6)         |
| Tralokinumab<br>600 mg then<br>300 mg q2<br>weeks | -0.4 (-1.8, 1.1)            | -3.6 (-5, -2.1)             | 0.8 (-0.7, 2.3)           | -0.8 (-2.4, 0.7)          | -2.7 (-3.9, -1.5)                              | 4.6 (3.6, 5.6)   |                                                   | -2.4 (-6.6, 1.8)            | -6 (-10.3, -1.9)            |
| Upadacitinib<br>15 mg daily                       | 2 (-2.2, 6.3)               | -1.2 (-5.4, 3)              | 3.2 (-1.1, 7.5)           | 1.5 (-2.8, 5.8)           | -0.3 (-4.5, 3.9)                               | 7 (2.9, 11.1)    | 2.4 (-1.8, 6.6)                                   |                             | -3.7 (-7.7, 0.4)            |
| Upadacitinib<br>30 mg daily                       | 5.6 (1.5, 10)               | 2.4 (-1.7, 6.7)             | 6.8 (2.6, 11.1)           | 5.2 (1, 9.5)              | 3.3 (-0.8, 7.6)                                | 10.6 (6.6, 14.8) | 6 (1.9, 10.3)                                     | 3.7 (-0.4, 7.7)             |                             |
| SUCRA                                             | 0.49                        | 0.85                        | 0.36                      | 0.54                      | 0.72                                           | 0.13             | 0.44                                              | 0.69                        | 0.95                        |



**eTable 5.** GRADE certainty ratings for change in POEM up to 16 weeks of treatment in adults for placebo and medications used in clinical practice or likely to be approved soon. Results are presented as change in EASI (95% CrI). Negative effect estimates favor the treatment listed in the intervention column; positive effect estimates favor the comparator.

| Intervention             | Comparator               | Head-to-head trials, n | Direct estimate (95% CrI); Certainty of Evidence | Indirect estimate (95% CrI); Certainty of Evidence | NMA Estimate (95% CrI); Certainty of Evidence |
|--------------------------|--------------------------|------------------------|--------------------------------------------------|----------------------------------------------------|-----------------------------------------------|
| Abrocitinib 100 mg daily | Abrocitinib 200 mg daily | 4                      | 3.2 (2.2, 4.2); high                             | --                                                 | 3.2 (2.2, 4.2); high                          |
| Abrocitinib 100 mg daily | Baricitinib 2 mg daily   | 0                      | --                                               |                                                    | -1.2 (-2.7, 0.4); moderate <sup>a</sup>       |
| Abrocitinib 100 mg daily | Baricitinib 4 mg daily   | 0                      | --                                               |                                                    | 0.5 (-1.1, 2.1); high                         |
| Abrocitinib 100 mg daily | Dupilumab                | 1                      | 1.6 (0.0, 3.2); high                             | 2.9 (1.3, 4.5); high                               | 2.3 (1.2, 3.5); high                          |
| Abrocitinib 100 mg daily | Placebo                  | 4                      | -5 (-6, -3.9); high                              | --                                                 | -5 (-6.0, -3.9); high                         |
| Abrocitinib 100 mg daily | Tralokinumab             | 0                      | --                                               | -0.4 (-1.8, 1.1); high                             | -0.4 (-1.8, 1.1); high                        |
| Abrocitinib 100 mg daily | Upadacitinib 15 mg daily | 0                      | --                                               | 2 (-2.2, 6.3); high                                | 2 (-2.2, 6.3); moderate <sup>a</sup>          |
| Abrocitinib 100 mg daily | Upadacitinib 30 mg daily | 0                      | --                                               | 5.6 (1.5, 10); high                                | 5.6 (1.5, 10); high                           |
| Abrocitinib 200 mg daily | Baricitinib 2 mg daily   | 0                      | --                                               | -4.4 (-5.9, -2.9); high                            | -4.4 (-5.9, -2.9); high                       |
| Abrocitinib 200 mg daily | Baricitinib 4 mg daily   | 0                      | --                                               | -2.7 (-4.3, -1.2); high                            | -2.7 (-4.3, -1.2); high                       |
| Abrocitinib 200 mg daily | Dupilumab                | 1                      | -1.7 (-3.3, -0.1); high                          | -0.2 (-1.7, 1.3); high                             | -0.9 (-2.0, 0.2); high                        |
| Abrocitinib 200 mg daily | Placebo                  | 4                      | -8.2 (-9.2, -7.1); high                          | --                                                 | -8.2 (-9.2, -7.1); high                       |
| Abrocitinib 200 mg daily | Tralokinumab             | 0                      | --                                               | -3.6 (-5, -2.1); high                              | -3.6 (-5, -2.1); high                         |
| Abrocitinib 200 mg daily | Upadacitinib 15 mg daily | 0                      | --                                               | -1.2 (-5.4, 3); high                               | -1.2 (-5.4, 3.0); moderate <sup>a</sup>       |
| Abrocitinib 200 mg daily | Upadacitinib 30 mg daily | 0                      | --                                               | 2.4 (-1.7, 6.7); high                              | 2.4 (-1.7, 6.7); moderate <sup>a</sup>        |
| Baricitinib 2 mg daily   | Baricitinib 4 mg daily   | 4                      | 1.6 (0.5, 2.8); high                             | --                                                 | 1.6 (0.5, 2.8); high                          |
| Baricitinib 2 mg daily   | Dupilumab                | 0                      | --                                               | 3.5 (2.2, 4.8); high                               | 3.5 (2.2, 4.8); high                          |
| Baricitinib 2 mg daily   | Placebo                  | 5                      | -3.8 (-4.9, -2.6); high                          | --                                                 | -3.8 (-4.9, -2.6); high                       |
| Baricitinib 2 mg daily   | Tralokinumab             | 0                      | --                                               | 0.8 (-0.7, 2.3); high                              | 0.8 (-0.7, 2.3); high                         |
| Baricitinib 2 mg daily   | Upadacitinib 15 mg daily | 0                      | --                                               | 3.2 (-1.1, 7.5); high                              | 3.2 (-1.1, 7.5); moderate <sup>a</sup>        |
| Baricitinib 2 mg daily   | Upadacitinib 30 mg daily | 0                      | --                                               | 6.8 (2.6, 11.1); high                              | 6.8 (2.6, 11.1); high                         |

|                          |                          |   |                           |                         |                                        |
|--------------------------|--------------------------|---|---------------------------|-------------------------|----------------------------------------|
| Baricitinib 4 mg daily   | Dupilumab                | 0 | --                        | 1.9 (0.5, 3.2); high    | 1.9 (0.5, 3.2); high                   |
| Baricitinib 4 mg daily   | Placebo                  | 4 | -5.4 (-6.6, -4.2); high   | --                      | -5.4 (-6.6, -4.2); high                |
| Baricitinib 4 mg daily   | Tralokinumab             | 0 | --                        | -0.8 (-2.4, 0.7); high  | -0.8 (-2.4, 0.7); high                 |
| Baricitinib 4 mg daily   | Upadacitinib 15 mg daily | 0 | --                        | 1.5 (-2.8, 5.8); high   | 1.5 (-2.8, 5.8); moderate <sup>a</sup> |
| Baricitinib 4 mg daily   | Upadacitinib 30 mg daily | 0 | --                        | 5.2 (1, 9.5); high      | 5.2 (1.0, 9.5); high                   |
| Dupilumab                | Placebo                  | 7 | -7.3 (-8, -6.6); high     | --                      | -7.3 (-8, -6.6); high                  |
| Dupilumab                | Tralokinumab             | 0 | --                        | -2.7 (-3.9, -1.5); high | -2.7 (-3.9, -1.5); high                |
| Dupilumab                | Upadacitinib 15 mg daily | 0 | --                        | -0.3 (-4.5, 3.9); high  | -0.3 (-4.5, 3.9); moderate             |
| Dupilumab                | Upadacitinib 30 mg daily | 0 | --                        | 3.3 (-0.8, 7.6); high   | 3.3 (-0.8, 7.6); moderate <sup>a</sup> |
| Tralokinumab             | Upadacitinib 15 mg daily | 0 | --                        | 2.4 (-1.8, 6.6); high   | 2.4 (-1.8, 6.6); moderate <sup>a</sup> |
| Tralokinumab             | Upadacitinib 30 mg daily | 0 | --                        | 6 (1.9, 10.3); high     | 6 (1.9, 10.3); high                    |
| Tralokinumab             | Placebo                  | 3 | -4.6 (-5.6, -3.6); high   | --                      | -4.6 (-5.6, -3.6); high                |
| Upadacitinib 15 mg daily | Upadacitinib 30 mg daily | 1 | 3.7 (-0.4, 7.7); high     | --                      | 3.7 (-0.4, 7.7); moderate <sup>a</sup> |
| Upadacitinib 15 mg daily | Placebo                  | 1 | -7 (-11.1, -2.9); high    | --                      | -7 (-11.1, -2.9); high                 |
| Upadacitinib 30 mg daily | Placebo                  | 1 | -10.6 (-14.8, -6.6); high | --                      | -10.6 (-14.8, -6.6); high              |

Dose of dupilumab and tralokinumab is 600 mg then 300 mg every 2 weeks

The network meta-analysis certainty ratings start at the higher of the direct or indirect ratings and can then be rated down further for incoherence (based on the results of node splitting analyses) and imprecision.

a. Rated down for imprecision

**eTable 6.** League table with relative effect estimates for change in DLQI up to 16 weeks of treatment in adults for placebo and medications used in clinical practice or likely to be approved soon. Results for other pairwise comparisons in the network can be requested from the authors. Results are presented as change in DLQI (95% CrI). A positive effect estimate in a given cell favors the row-defining treatment. A negative effect estimate in a given cell favors the column-defining treatment. The bottom row contains the Surface Under the Cumulative Ranking (SUCRA) value for the column-defining treatment.

|                                          | Abrocitinib 100 mg daily | Abrocitinib 200 mg daily | Baricitinib 2 mg daily | Baricitinib 4 mg daily | Dupilumab 600 mg then 300 mg q2 weeks | Placebo        | Tralokinumab 600 mg then 300 mg q2 weeks |
|------------------------------------------|--------------------------|--------------------------|------------------------|------------------------|---------------------------------------|----------------|------------------------------------------|
| Abrocitinib 100 mg daily                 |                          | -2.1 (-2.9, -1.1)        | 1.1 (-0.1, 2.4)        | -0.1 (-1.4, 1.2)       | -1.5 (-2.5, -0.5)                     | 3.4 (2.5, 4.3) | 0.4 (-0.8, 1.8)                          |
| Abrocitinib 200 mg daily                 | 2.1 (1.1, 2.9)           |                          | 3.2 (2, 4.5)           | 1.9 (0.6, 3.3)         | 0.6 (-0.4, 1.5)                       | 5.5 (4.6, 6.4) | 2.5 (1.2, 3.8)                           |
| Baricitinib 2 mg daily                   | -1.1 (-2.4, 0.1)         | -3.2 (-4.5, -2)          |                        | -1.3 (-2.2, -0.3)      | -2.6 (-3.7, -1.6)                     | 2.3 (1.4, 3.1) | -0.7 (-2, 0.6)                           |
| Baricitinib 4 mg daily                   | 0.1 (-1.2, 1.4)          | -1.9 (-3.3, -0.6)        | 1.3 (0.3, 2.2)         |                        | -1.4 (-2.5, -0.3)                     | 3.5 (2.6, 4.4) | 0.6 (-0.8, 1.9)                          |
| Dupilumab 600 mg then 300 mg q2 weeks    | 1.5 (0.5, 2.5)           | -0.6 (-1.5, 0.4)         | 2.6 (1.6, 3.7)         | 1.4 (0.3, 2.5)         |                                       | 4.9 (4.3, 5.5) | 2 (0.8, 3.1)                             |
| Placebo                                  | -3.4 (-4.3, -2.5)        | -5.5 (-6.4, -4.6)        | -2.3 (-3.1, -1.4)      | -3.5 (-4.4, -2.6)      | -4.9 (-5.5, -4.3)                     |                | -3 (-3.9, -2)                            |
| Tralokinumab 600 mg then 300 mg q2 weeks | -0.4 (-1.8, 0.8)         | -2.5 (-3.8, -1.2)        | 0.7 (-0.6, 2)          | -0.6 (-1.9, 0.8)       | -2 (-3.1, -0.8)                       | 3 (2, 3.9)     |                                          |
| SUCRA                                    | 0.72                     | 0.96                     | 0.56                   | 0.74                   | 0.90                                  | 0.22           | 0.66                                     |

Dose of dupilumab and tralokinumab is 600 mg then 300 mg every 2 weeks

**eTable 7.** GRADE certainty ratings for change in DLQI up to 16 weeks of treatment in adults for placebo and medications used in clinical practice or likely to be approved soon. Results are presented as change in EASI (95% CrI). Negative effect estimates favor the treatment listed in the intervention column; positive effect estimates favor the comparator.

| Intervention             | Comparator               | Head-to-head trials, n | Direct estimate (95% CrI); Certainty of Evidence | Indirect estimate (95% CrI); Certainty of Evidence | NMA Estimate (95% CrI); Certainty of Evidence |
|--------------------------|--------------------------|------------------------|--------------------------------------------------|----------------------------------------------------|-----------------------------------------------|
| Abrocitinib 100 mg daily | Abrocitinib 200 mg daily | 4                      | 2.1 (1.1, 2.9); moderate*                        | --                                                 | 2.1 (1.1, 2.9); moderate                      |
| Abrocitinib 100 mg daily | Baricitinib 2 mg daily   | 0                      | --                                               | -1.1 (-2.4, 0.1); high                             | -1.1 (-2.4, 0.1); moderate <sup>a</sup>       |
| Abrocitinib 100 mg daily | Baricitinib 4 mg daily   | 0                      | --                                               | 0.1 (-1.2, 1.4); high                              | 0.1 (-1.2, 1.4); high                         |
| Abrocitinib 100 mg daily | Dupilumab                | 1                      | 1.8 (0.5, 3.1); high                             | 1.1 (-0.4, 2.5)                                    | 1.5 (0.5, 2.5); high                          |
| Abrocitinib 100 mg daily | Placebo                  | 4                      | -3.4 (-4.3, -2.5); high                          | --                                                 | -3.4 (-4.3, -2.5); high                       |
| Abrocitinib 100 mg daily | Tralokinumab             | 0                      | --                                               | -0.4 (-1.8, 0.8); high                             | -0.4 (-1.8, 0.8); high                        |
| Abrocitinib 200 mg daily | Baricitinib 2 mg daily   | 0                      | --                                               | -3.2 (-4.5, -2); high                              | -3.2 (-4.5, -2); high                         |
| Abrocitinib 200 mg daily | Baricitinib 4 mg daily   | 0                      | --                                               | -1.9 (-3.3, -0.6); high                            | -1.9 (-3.3, -0.6); high                       |
| Abrocitinib 200 mg daily | Dupilumab                | 1                      | -0.9 (-2.3, 0.5); high                           | -0.1 (-1.6, 1.4)                                   | -0.6 (-1.5, 0.4); high                        |
| Abrocitinib 200 mg daily | Placebo                  | 4                      | -5.5 (-6.4, -4.6); high                          | --                                                 | -5.5 (-6.4, -4.6); high                       |
| Abrocitinib 200 mg daily | Tralokinumab             | 0                      | --                                               | -2.5 (-3.8, -1.2); high                            | -2.5 (-3.8, -1.2); high                       |
| Baricitinib 2 mg daily   | Baricitinib 4 mg daily   | 5                      | 1.3 (0.3, 2.2); moderate*                        | --                                                 | 1.3 (0.3, 2.2); moderate                      |
| Baricitinib 2 mg daily   | Dupilumab                | 0                      | --                                               | 2.6 (1.6, 3.7); high                               | 2.6 (1.6, 3.7); high                          |
| Baricitinib 2 mg daily   | Placebo                  | 6                      | -2.3 (-3.1, -1.4); high                          | --                                                 | -2.3 (-3.1, -1.4); high                       |
| Baricitinib 2 mg daily   | Tralokinumab             | 0                      | --                                               | 0.7 (-0.6, 2); high                                | 0.7 (-0.6, 2); high                           |
| Baricitinib 4 mg daily   | Dupilumab                | 0                      | --                                               | 1.4 (0.3, 2.5); high                               | 1.4 (0.3, 2.5); high                          |
| Baricitinib 4 mg daily   | Placebo                  | 5                      | -3.5 (-4.4, -2.6); high                          | --                                                 | -3.5 (-4.4, -2.6); high                       |
| Baricitinib 4 mg daily   | Tralokinumab             | 0                      | --                                               | -0.6 (-1.9, 0.8); high                             | -0.6 (-1.9, 0.8); high                        |
| Dupilumab                | Placebo                  | 7                      | -4.9 (-5.5, -4.3); high                          | --                                                 | -4.9 (-5.5, -4.3); high                       |
| Dupilumab                | Tralokinumab             | 0                      | --                                               | -2 (-3.1, -0.8); high                              | -2 (-3.1, -0.8); high                         |
| Tralokinumab             | Placebo                  | 3                      | -3 (-3.9, -2); high                              | --                                                 | -3 (-3.9, -2); high                           |

Dose of dupilumab and tralokinumab is 600 mg then 300 mg every 2 weeks

The network meta-analysis certainty ratings start at the higher of the direct or indirect ratings and can then be rated down further for incoherence (based on the results of node splitting analyses) and imprecision.

a. Rated down for imprecision

\* Rated down for inconsistency

**eTable 8.** League table with relative effect estimates for change in peak pruritus numeric rating scales up to 16 weeks of treatment in adults for placebo and medications used in clinical practice or likely to be approved soon. Results for other pairwise comparisons in the network can be requested from the authors. Results are presented as change in the numeric rating scales (95% CrI). A positive effect estimate in a given cell favors the row-defining treatment. A negative effect estimate in a given cell favors the column-defining treatment. The bottom row contains the Surface Under the Cumulative Ranking (SUCRA) value for the column-defining treatment.

|                                          | Abrocitinib 100 mg daily | Abrocitinib 200 mg daily | Baricitinib 2 mg daily | Baricitinib 4 mg daily | Dupilumab 600 mg then 300 mg q2 weeks | Placebo        | Tralokinumab 600 mg then 300 mg q2 weeks | Upadacitinib 15 mg once daily | Upadacitinib 30 mg once daily |
|------------------------------------------|--------------------------|--------------------------|------------------------|------------------------|---------------------------------------|----------------|------------------------------------------|-------------------------------|-------------------------------|
| Abrocitinib 100 mg daily                 |                          | -0.8 (-1.3, -0.4)        | 0.3 (-0.4, 0.9)        | -0.1 (-0.9, 0.6)       | -0.4 (-1, 0.2)                        | 1.6 (1, 2.1)   | 0.5 (-0.2, 1.1)                          | -0.8 (-1.5, -0.2)             | -1.8 (-2.5, -1.1)             |
| Abrocitinib 200 mg daily                 | 0.8 (0.4, 1.3)           |                          | 1.1 (0.4, 1.8)         | 0.7 (0, 1.4)           | 0.4 (-0.2, 1)                         | 2.4 (1.9, 3)   | 1.3 (0.6, 1.9)                           | 0 (-0.7, 0.7)                 | -1 (-1.7, -0.3)               |
| Baricitinib 2 mg daily                   | -0.3 (-0.9, 0.4)         | -1.1 (-1.8, -0.4)        |                        | -0.4 (-0.8, 0.1)       | -0.7 (-1.2, -0.2)                     | 1.3 (0.9, 1.7) | 0.2 (-0.3, 0.7)                          | -1.1 (-1.7, -0.5)             | -2.1 (-2.7, -1.5)             |
| Baricitinib 4 mg daily                   | 0.1 (-0.6, 0.9)          | -0.7 (-1.4, 0)           | 0.4 (-0.1, 0.8)        |                        | -0.3 (-0.8, 0.2)                      | 1.7 (1.3, 2.2) | 0.6 (0.1, 1.1)                           | -0.7 (-1.3, -0.1)             | -1.7 (-2.3, -1.1)             |
| Dupilumab 600 mg then 300 mg q2 weeks    | 0.4 (-0.2, 1)            | -0.4 (-1, 0.2)           | 0.7 (0.2, 1.2)         | 0.3 (-0.2, 0.8)        |                                       | 2 (1.8, 2.3)   | 0.9 (0.5, 1.3)                           | -0.4 (-0.9, 0.1)              | -1.4 (-1.9, -0.9)             |
| Placebo                                  | -1.6 (-2.1, -1)          | -2.4 (-3, -1.9)          | -1.3 (-1.7, -0.9)      | -1.7 (-2.2, -1.3)      | -2 (-2.3, -1.8)                       |                | -1.1 (-1.4, -0.8)                        | -2.4 (-2.8, -2)               | -3.4 (-3.8, -3)               |
| Tralokinumab 600 mg then 300 mg q2 weeks | -0.5 (-1.1, 0.2)         | -1.3 (-1.9, -0.6)        | -0.2 (-0.7, 0.3)       | -0.6 (-1.1, -0.1)      | -0.9 (-1.3, -0.5)                     | 1.1 (0.8, 1.4) |                                          | -1.3 (-1.8, -0.8)             | -2.3 (-2.8, -1.8)             |
| Upadacitinib 15 mg once daily            | 0.8 (0.2, 1.5)           | 0 (-0.7, 0.7)            | 1.1 (0.5, 1.7)         | 0.7 (0.1, 1.3)         | 0.4 (-0.1, 0.9)                       | 2.4 (2, 2.8)   | 1.3 (0.8, 1.8)                           |                               | -1 (-1.4, -0.6)               |
| Upadacitinib 30 mg once daily            | 1.8 (1.1, 2.5)           | 1 (0.3, 1.7)             | 2.1 (1.5, 2.7)         | 1.7 (1.1, 2.3)         | 1.4 (0.9, 1.9)                        | 3.4 (3, 3.8)   | 2.3 (1.8, 2.8)                           | 1 (0.6, 1.4)                  |                               |
| SUCRA                                    | 0.47                     | 0.74                     | 0.39                   | 0.50                   | 0.60                                  | 0.09           | 0.33                                     | 0.74                          | 0.92                          |

Dose of dupilumab and tralokinumab is 600 mg then 300 mg every 2 weeks

a. Rated down for imprecision

**eTable 9.** GRADE certainty ratings for change in peak pruritus numeric rating scales up to 16 weeks of treatment in adults for placebo and medications used in clinical practice or likely to be approved soon. Results are presented as change in EASI (95% CrI). Negative effect estimates favor the treatment listed in the intervention column; positive effect estimates favor the comparator.

| Intervention             | Comparator               | Head-to-head trials, n | Direct estimate (95% CrI); Certainty of Evidence | Indirect estimate (95% CrI); Certainty of Evidence | NMA Estimate (95% CrI); Certainty of Evidence |
|--------------------------|--------------------------|------------------------|--------------------------------------------------|----------------------------------------------------|-----------------------------------------------|
| Abrocitinib 100 mg daily | Abrocitinib 200 mg daily | 3                      | 0.8 (0.4, 1.3); high                             | --                                                 | 0.8 (0.4, 1.3); high                          |
| Abrocitinib 100 mg daily | Baricitinib 2 mg daily   | 0                      | --                                               | -0.3 (-0.9, 0.4); high                             | -0.3 (-0.9, 0.4); high                        |
| Abrocitinib 100 mg daily | Baricitinib 4 mg daily   | 0                      | --                                               | 0.1 (-0.6, 0.9); high                              | 0.1 (-0.6, 0.9); high                         |
| Abrocitinib 100 mg daily | Dupilumab                | 0                      | --                                               | 0.4 (-0.2, 1); high                                | 0.4 (-0.2, 1); high                           |
| Abrocitinib 100 mg daily | Placebo                  | 3                      | -1.6 (-2.1, -1); high                            | --                                                 | -1.6 (-2.1, -1); high                         |
| Abrocitinib 100 mg daily | Tralokinumab             | 0                      | --                                               | -0.5 (-1.1, 0.2); high                             | -0.5 (-1.1, 0.2); high                        |
| Abrocitinib 100 mg daily | Upadacitinib 15 mg daily | 0                      | --                                               | 0.8 (0.2, 1.5); high                               | 0.8 (0.2, 1.5); high                          |
| Abrocitinib 100 mg daily | Upadacitinib 30 mg daily | 0                      | --                                               | 1.8 (1.1, 2.5); high                               | 1.8 (1.1, 2.5); high                          |
| Abrocitinib 200 mg daily | Baricitinib 2 mg daily   | 0                      | --                                               | -1.1 (-1.8, -0.4); high                            | -1.1 (-1.8, -0.4); high                       |
| Abrocitinib 200 mg daily | Baricitinib 4 mg daily   | 0                      | --                                               | -0.7 (-1.4, 0); high                               | -0.7 (-1.4, 0); high                          |
| Abrocitinib 200 mg daily | Dupilumab                | 0                      | --                                               | -0.4 (-1, 0.2); high                               | -0.4 (-1, 0.2); high                          |
| Abrocitinib 200 mg daily | Placebo                  | 3                      | -2.4 (-3, -1.9); high                            | --                                                 | -2.4 (-3, -1.9); high                         |
| Abrocitinib 200 mg daily | Tralokinumab             | 0                      | --                                               | -1.3 (-1.9, -0.6); high                            | -1.3 (-1.9, -0.6); high                       |
| Abrocitinib 200 mg daily | Upadacitinib 15 mg daily | 0                      | --                                               | 0 (-0.7, 0.7); high                                | 0 (-0.7, 0.7); high                           |
| Abrocitinib 200 mg daily | Upadacitinib 30 mg daily | 0                      | --                                               | 1 (0.3, 1.7); high                                 | 1 (0.3, 1.7); high                            |
| Baricitinib 2 mg daily   | Baricitinib 4 mg daily   | 3                      | 0.4 (-0.1, 0.8); high                            | --                                                 | 0.4 (-0.1, 0.8); high                         |
| Baricitinib 2 mg daily   | Dupilumab                | 0                      | --                                               | 0.7 (0.2, 1.2); high                               | 0.7 (0.2, 1.2); high                          |
| Baricitinib 2 mg daily   | Placebo                  | 4                      | -1.3 (-1.7, -0.9); high                          | --                                                 | -1.3 (-1.7, -0.9); high                       |
| Baricitinib 2 mg daily   | Tralokinumab             | 0                      | --                                               | -0.2 (-0.7, 0.3); high                             | -0.2 (-0.7, 0.3); high                        |
| Baricitinib 2 mg daily   | Upadacitinib 15 mg daily | 0                      | --                                               | 1.1 (0.5, 1.7); high                               | 1.1 (0.5, 1.7) high                           |
| Baricitinib 2 mg daily   | Upadacitinib 30 mg daily | 0                      | --                                               | 2.1 (1.5, 2.7); high                               | 2.1 (1.5, 2.7); high                          |
| Baricitinib 4 mg daily   | Dupilumab                | 0                      | --                                               | 0.3 (-0.2, 0.8); high                              | 0.3 (-0.2, 0.8); high                         |
| Baricitinib 4 mg daily   | Placebo                  | 3                      | -1.7 (-2.2, -1.3); high                          | --                                                 | -1.7 (-2.2, -1.3); high                       |
| Baricitinib 4 mg daily   | Tralokinumab             | 0                      | --                                               | -0.6 (-1.1, -0.1); high                            | -0.6 (-1.1, -0.1); high                       |
| Baricitinib 4 mg daily   | Upadacitinib 15 mg daily | 0                      | --                                               | 0.7 (0.1, 1.3); high                               | 0.7 (0.1, 1.3); high                          |
| Baricitinib 4 mg daily   | Upadacitinib 30 mg daily | 0                      | --                                               | 1.7 (1.1, 2.3); high                               | 1.7 (1.1, 2.3); high                          |

|                          |                          |   |                         |                         |                         |
|--------------------------|--------------------------|---|-------------------------|-------------------------|-------------------------|
| Dupilumab                | Placebo                  | 6 | -2 (-2.3, -1.8); high   | --                      | -2 (-2.3, -1.8); high   |
| Dupilumab                | Tralokinumab             | 0 | --                      | -0.9 (-1.3, -0.5); high | -0.9 (-1.3, -0.5); high |
| Dupilumab                | Upadacitinib 15 mg daily | 0 | --                      | 0.4 (-0.1, 0.9); high   | 0.4 (-0.1, 0.9); high   |
| Dupilumab                | Upadacitinib 30 mg daily | 0 | --                      | 1.4 (0.9, 1.9); high    | 1.4 (0.9, 1.9); high    |
| Tralokinumab             | Upadacitinib 15 mg daily | 0 | --                      | 1.3 (0.8, 1.8); high    | 1.3 (0.8, 1.8); high    |
| Tralokinumab             | Upadacitinib 30 mg daily | 0 | --                      | 2.3 (1.8, 2.8); high    | 2.3 (1.8, 2.8); high    |
| Tralokinumab             | Placebo                  | 3 | -1.1 (-1.4, -0.8); high | --                      | -1.1 (-1.4, -0.8); high |
| Upadacitinib 15 mg daily | Upadacitinib 30 mg daily | 3 | 1 (0.6, 1.4); high      | --                      | 1 (0.6, 1.4); high      |
| Upadacitinib 15 mg daily | Placebo                  | 3 | -2.4 (-2.8, -2); high   | --                      | -2.4 (-2.8, -2); high   |
| Upadacitinib 30 mg daily | Placebo                  | 3 | -3.4 (-3.8, -3); high   | --                      | -3.4 (-3.8, -3); high   |

Dose of dupilumab and tralokinumab is 600 mg then 300 mg every 2 weeks

The network meta-analysis certainty ratings start at the higher of the direct or indirect ratings and can then be rated down further for incoherence (based on the results of node splitting analyses) and imprecision.

a. Rated down for imprecision

**eFigure 1.** Network graphs of studies included in the analysis of adults treated between 8 and 16 weeks for change in signs on the standardized mean difference scale. The width of each line connecting two treatments (nodes) is proportional to the number of head-to-head trials for that comparison.

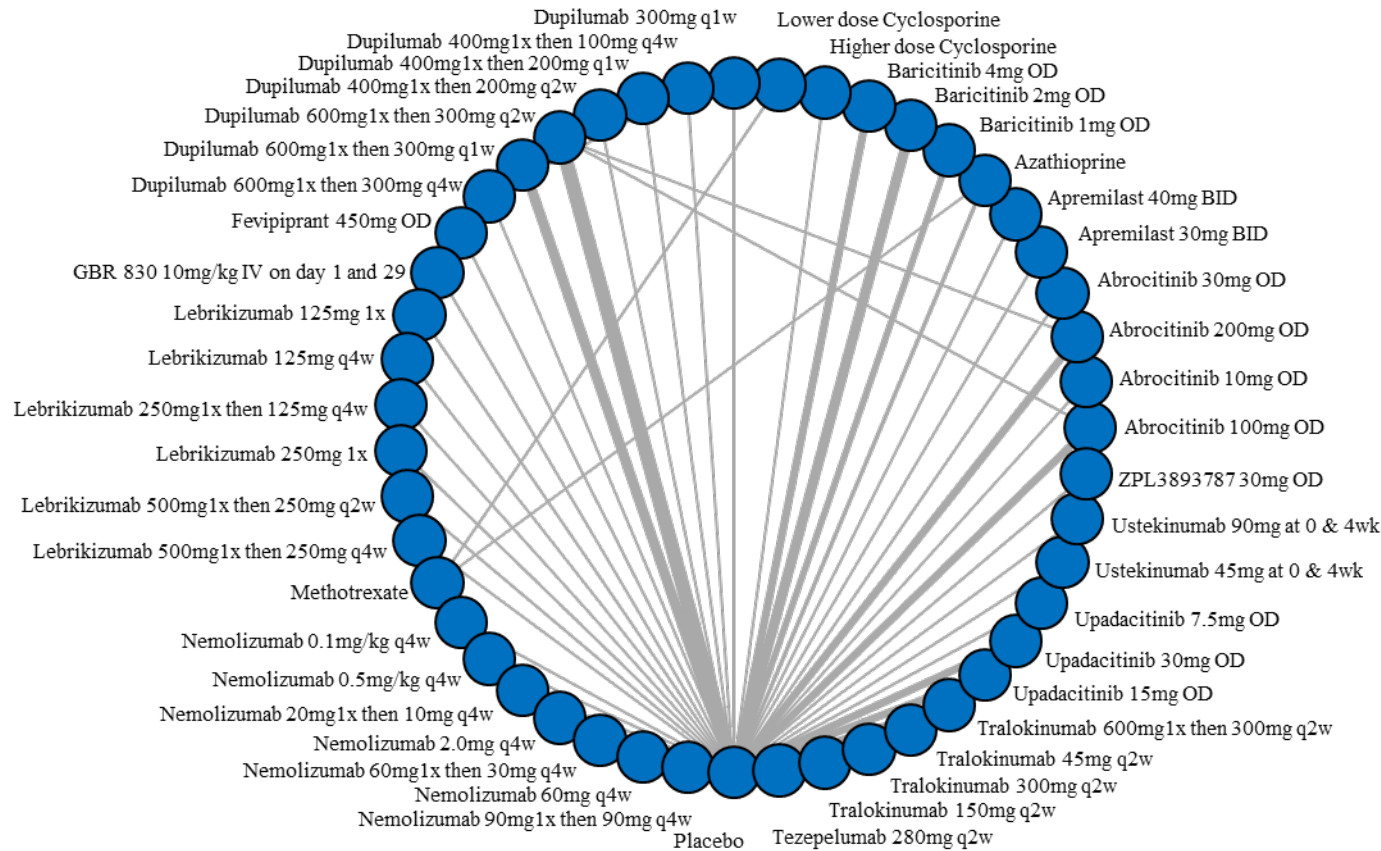

OD: once daily; q1w: once weekly; q2w: every 2 weeks; q4w: every 4 weeks.



**eTable 10.** League table with relative effect estimates for change in signs up to 16 weeks of treatment in adults for placebo and medications used in clinical practice or likely to be approved soon. Results for other pairwise comparisons in the network can be requested from the authors. Results are presented as change in standardized mean difference of signs scales (95% CrI). A positive effect estimate in a given cell favors the row-defining treatment. A negative effect estimate in a given cell favors the column-defining treatment. The bottom row contains the Surface Under the Cumulative Ranking (SUCRA) value for the column-defining treatment.

|                            | Abrocitinib 100 mg daily | Abrocitinib 200 mg daily | Azathioprine     | Baricitinib 2 mg daily | Baricitinib 4 mg daily | Cyclosporine (higher dose) | Cyclosporine (lower dose) | Dupilumab*        | Methotrexate     | Placebo        | Tralokinumab*     | Upadacitinib 15 mg daily | Upadacitinib 30 mg daily |
|----------------------------|--------------------------|--------------------------|------------------|------------------------|------------------------|----------------------------|---------------------------|-------------------|------------------|----------------|-------------------|--------------------------|--------------------------|
| Abrocitinib 100 mg daily   |                          | -0.4 (-0.6, -0.3)        | 0.1 (-0.3, 0.6)  | 0.4 (0.2, 0.6)         | 0.3 (0, 0.5)           | -0.3 (-0.9, 0.4)           | 0 (-0.6, 0.7)             | -0.1 (-0.3, 0)    | 0.1 (-0.5, 0.7)  | 0.8 (0.6, 0.9) | 0.2 (0, 0.4)      | -0.4 (-0.6, -0.2)        | -0.6 (-0.8, -0.4)        |
| Abrocitinib 200 mg daily   | 0.4 (0.3, 0.6)           |                          | 0.6 (0.1, 1)     | 0.8 (0.6, 1)           | 0.7 (0.5, 0.9)         | 0.1 (-0.5, 0.8)            | 0.4 (-0.2, 1.1)           | 0.3 (0.1, 0.4)    | 0.5 (-0.1, 1.2)  | 1.2 (1, 1.3)   | 0.6 (0.4, 0.8)    | 0 (-0.2, 0.2)            | -0.2 (-0.4, 0)           |
| Azathioprine               | -0.1 (-0.6, 0.3)         | -0.6 (-1, -0.1)          |                  | 0.2 (-0.2, 0.7)        | 0.1 (-0.3, 0.5)        | -0.4 (-1, 0.2)             | -0.1 (-0.7, 0.5)          | -0.3 (-0.7, 0.1)  | 0 (-0.6, 0.5)    | 0.6 (0.2, 1)   | 0 (-0.4, 0.5)     | -0.5 (-0.9, -0.1)        | -0.8 (-1.2, -0.3)        |
| Baricitinib 2 mg daily     | -0.4 (-0.6, -0.2)        | -0.8 (-1, -0.6)          | -0.2 (-0.7, 0.2) |                        | -0.1 (-0.3, 0)         | -0.7 (-1.3, 0)             | -0.4 (-1, 0.3)            | -0.5 (-0.7, -0.3) | -0.3 (-0.9, 0.4) | 0.4 (0.2, 0.5) | -0.2 (-0.4, 0)    | -0.8 (-1, -0.6)          | -1 (-1.2, -0.8)          |
| Baricitinib 4 mg daily     | -0.3 (-0.5, 0)           | -0.7 (-0.9, -0.5)        | -0.1 (-0.5, 0.3) | 0.1 (0, 0.3)           |                        | -0.5 (-1.1, 0.1)           | -0.2 (-0.9, 0.4)          | -0.4 (-0.6, -0.2) | -0.1 (-0.8, 0.5) | 0.5 (0.4, 0.7) | -0.1 (-0.3, 0.1)  | -0.6 (-0.8, -0.4)        | -0.9 (-1.1, -0.7)        |
| Cyclosporine (higher dose) | 0.3 (-0.4, 0.9)          | -0.1 (-0.8, 0.5)         | 0.4 (-0.2, 1)    | 0.7 (0, 1.3)           | 0.5 (-0.1, 1.1)        |                            | 0.3 (-0.1, 0.7)           | 0.2 (-0.5, 0.8)   | 0.4 (-0.2, 0.9)  | 1 (0.4, 1.6)   | 0.5 (-0.2, 1.1)   | -0.1 (-0.7, 0.5)         | -0.4 (-1, 0.3)           |
| Cyclosporine (lower dose)  | 0 (-0.7, 0.6)            | -0.4 (-1.1, 0.2)         | 0.1 (-0.5, 0.7)  | 0.4 (-0.3, 1)          | 0.2 (-0.4, 0.9)        | -0.3 (-0.7, 0.1)           |                           | -0.2 (-0.8, 0.5)  | 0.1 (-0.4, 0.6)  | 0.7 (0.1, 1.4) | 0.2 (-0.5, 0.8)   | -0.4 (-1, 0.2)           | -0.7 (-1.3, 0)           |
| Dupilumab*                 | 0.1 (0, 0.3)             | -0.3 (-0.4, -0.1)        | 0.3 (-0.1, 0.7)  | 0.5 (0.3, 0.7)         | 0.4 (0.2, 0.6)         | -0.2 (-0.8, 0.5)           | 0.2 (-0.5, 0.8)           |                   | 0.2 (-0.4, 0.9)  | 0.9 (0.8, 1)   | 0.3 (0.1, 0.5)    | -0.2 (-0.4, -0.1)        | -0.5 (-0.7, -0.3)        |
| Methotrexate               | -0.1 (-0.7, 0.5)         | -0.5 (-1.2, 0.1)         | 0 (-0.5, 0.6)    | 0.3 (-0.4, 0.9)        | 0.1 (-0.5, 0.8)        | -0.4 (-0.9, 0.2)           | -0.1 (-0.6, 0.4)          | -0.2 (-0.9, 0.4)  |                  | 0.6 (0, 1.3)   | 0.1 (-0.6, 0.7)   | -0.5 (-1.1, 0.1)         | -0.8 (-1.4, -0.1)        |
| Placebo                    | -0.8 (-0.9, -0.6)        | -1.2 (-1.3, -1)          | -0.6 (-1, -0.2)  | -0.4 (-0.5, -0.2)      | -0.5 (-0.7, -0.4)      | -1 (-1.6, -0.4)            | -0.7 (-1.4, -0.1)         | -0.9 (-1, -0.8)   | -0.6 (-1.3, 0)   |                | -0.6 (-0.7, -0.4) | -1.1 (-1.3, -1)          | -1.4 (-1.5, -1.3)        |
| Tralokinumab*              | -0.2 (-0.4, 0)           | -0.6 (-0.8, -0.4)        | 0 (-0.5, 0.4)    | 0.2 (0, 0.4)           | 0.1 (-0.1, 0.3)        | -0.5 (-1.1, 0.2)           | -0.2 (-0.8, 0.5)          | -0.3 (-0.5, -0.1) | -0.1 (-0.7, 0.6) | 0.6 (0.4, 0.7) |                   | -0.6 (-0.7, -0.4)        | -0.8 (-1, -0.6)          |
| Upadacitinib 15 mg daily   | 0.4 (0.2, 0.6)           | 0 (-0.2, 0.2)            | 0.5 (0.1, 0.9)   | 0.8 (0.6, 1)           | 0.6 (0.4, 0.8)         | 0.1 (-0.5, 0.7)            | 0.4 (-0.2, 1)             | 0.2 (0.1, 0.4)    | 0.5 (-0.1, 1.1)  | 1.1 (1, 1.3)   | 0.6 (0.4, 0.7)    |                          | -0.3 (-0.4, -0.1)        |
| Upadacitinib 30 mg daily   | 0.6 (0.4, 0.8)           | 0.2 (0, 0.4)             | 0.8 (0.3, 1.2)   | 1 (0.8, 1.2)           | 0.9 (0.7, 1.1)         | 0.4 (-0.3, 1)              | 0.7 (0, 1.3)              | 0.5 (0.3, 0.7)    | 0.8 (0.1, 1.4)   | 1.4 (1.3, 1.5) | 0.8 (0.6, 1)      | 0.3 (0.1, 0.4)           |                          |
| SUCRA                      | 0.72                     | 0.91                     | 0.59             | 0.38                   | 0.51                   | 0.83                       | 0.66                      | 0.80              | 0.60             | 0.09           | 0.58              | 0.90                     | 0.96                     |

\*Dose of dupilumab and tralokinumab is 600 mg then 300 mg every 2 weeks

**eTable 11.** GRADE certainty ratings for change in the standardized mean difference of clinical signs up to 16 weeks of treatment in adults for placebo and medications used in clinical practice or likely to be approved soon. Results are presented standardized mean difference (95% CrI). Negative effect estimates favor the treatment listed in the intervention column; positive effect estimates favor the comparator.

| Intervention             | Comparator                 | Head-to-head trials, n | Direct estimate (95% CrI); Certainty of Evidence | Indirect estimate (95% CrI); Certainty of Evidence | NMA Estimate (95% CrI); Certainty of Evidence |
|--------------------------|----------------------------|------------------------|--------------------------------------------------|----------------------------------------------------|-----------------------------------------------|
| Abrocitinib 100 mg daily | Abrocitinib 200 mg daily   | 4                      | 0.4 (0.3, 0.6); high                             | --                                                 | 0.4 (0.3, 0.6); high                          |
| Abrocitinib 100 mg daily | Azathioprine               | 0                      | --                                               | -0.1 (-0.6, 0.3); moderate <sup>a</sup>            | -0.1 (-0.6, 0.3); low <sup>b</sup>            |
| Abrocitinib 100 mg daily | Baricitinib 2 mg daily     | 0                      | --                                               | -0.4 (-0.6, -0.2); high                            | -0.4 (-0.6, -0.2); high                       |
| Abrocitinib 100 mg daily | Baricitinib 4 mg daily     | 0                      | --                                               | -0.3 (-0.5, 0); high                               | -0.3 (-0.5, 0); high                          |
| Abrocitinib 100 mg daily | Cyclosporine (higher dose) | 0                      | --                                               | 0.3 (-0.4, 0.9); moderate <sup>a</sup>             | 0.3 (-0.4, 0.9); low <sup>b</sup>             |
| Abrocitinib 100 mg daily | Cyclosporine (lower dose)  | 0                      | --                                               | 0 (-0.7, 0.6); moderate <sup>a</sup>               | 0 (-0.7, 0.6); low <sup>b</sup>               |
| Abrocitinib 100 mg daily | Dupilumab                  | 1                      | 0.1 (-0.1, 0.3); high                            | 0.2 (0.0, 0.4); high                               | 0.1 (0, 0.3); high                            |
| Abrocitinib 100 mg daily | Methotrexate               | 0                      | --                                               | -0.1 (-0.7, 0.5); moderate <sup>a</sup>            | -0.1 (-0.7, 0.5); low <sup>b</sup>            |
| Abrocitinib 100 mg daily | Placebo                    | 4                      | -0.8 (-0.9, -0.6); high                          | --                                                 | -0.8 (-0.9, -0.6); high                       |
| Abrocitinib 100 mg daily | Tralokinumab               | 0                      | --                                               | -0.2 (-0.4, 0); high                               | -0.2 (-0.4, 0); high                          |
| Abrocitinib 100 mg daily | Upadacitinib 15 mg daily   | 0                      | --                                               | 0.4 (0.2, 0.6); high                               | 0.4 (0.2, 0.6); high                          |
| Abrocitinib 100 mg daily | Upadacitinib 30 mg daily   | 0                      | --                                               | 0.6 (0.4, 0.8); high                               | 0.6 (0.4, 0.8); high                          |
| Abrocitinib 200 mg daily | Azathioprine               | 0                      | --                                               | -0.6 (-1, -0.1); high                              | -0.6 (-1, -0.1); high                         |
| Abrocitinib 200 mg daily | Baricitinib 2 mg daily     | 0                      | --                                               | -0.8 (-1, -0.6); high                              | -0.8 (-1, -0.6); high                         |
| Abrocitinib 200 mg daily | Baricitinib 4 mg daily     | 0                      | --                                               | -0.7 (-0.9, -0.5); high                            | -0.7 (-0.9, -0.5); high                       |
| Abrocitinib 200 mg daily | Cyclosporine (higher dose) | 0                      | --                                               | -0.1 (-0.8, 0.5); moderate <sup>a</sup>            | -0.1 (-0.8, 0.5); low <sup>b</sup>            |
| Abrocitinib 200 mg daily | Cyclosporine (lower dose)  | 0                      | --                                               | -0.4 (-1.1, 0.2); moderate <sup>a</sup>            | -0.4 (-1.1, 0.2); low <sup>b</sup>            |
| Abrocitinib 200 mg daily | Dupilumab                  | 1                      | -0.3 (-0.5, -0.1); high                          | -0.2 (-0.5, 0); high                               | -0.3 (-0.4, -0.1); high                       |
| Abrocitinib 200 mg daily | Methotrexate               | 0                      | --                                               | -0.5 (-1.2, 0.1); moderate <sup>a</sup>            | -0.5 (-1.2, 0.1); low <sup>b</sup>            |

|                          |                            |   |                                          |                                         |                                     |
|--------------------------|----------------------------|---|------------------------------------------|-----------------------------------------|-------------------------------------|
| Abrocitinib 200 mg daily | Placebo                    | 4 | -1.2 (-1.3, -1); high                    | --                                      | -1.2 (-1.3, -1); high               |
| Abrocitinib 200 mg daily | Tralokinumab               | 0 | --                                       | -0.6 (-0.8, -0.4); high                 | -0.6 (-0.8, -0.4); high             |
| Abrocitinib 200 mg daily | Upadacitinib 15 mg daily   | 0 | --                                       | 0 (-0.2, 0.2); high                     | 0 (-0.2, 0.2); high                 |
| Abrocitinib 200 mg daily | Upadacitinib 30 mg daily   | 0 | --                                       | 0.2 (0, 0.4); high                      | 0.2 (0, 0.4); moderate <sup>b</sup> |
| Azathioprine             | Baricitinib 2 mg daily     | 0 | --                                       | -0.2 (-0.7, 0.2); moderate <sup>a</sup> | -0.2 (-0.7, 0.2); low <sup>b</sup>  |
| Azathioprine             | Baricitinib 4 mg daily     | 0 | --                                       | -0.1 (-0.5, 0.3); moderate <sup>a</sup> | -0.1 (-0.5, 0.3); moderate          |
| Azathioprine             | Cyclosporine (higher dose) | 0 | --                                       | 0.4 (-0.2, 1); moderate <sup>a</sup>    | 0.4 (-0.2, 1); low <sup>b</sup>     |
| Azathioprine             | Cyclosporine (lower dose)  | 0 | --                                       | 0.1 (-0.5, 0.7); moderate <sup>a</sup>  | 0.1 (-0.5, 0.7); moderate           |
| Azathioprine             | Dupilumab                  | 0 | --                                       | 0.3 (-0.1, 0.7); moderate <sup>a</sup>  | 0.3 (-0.1, 0.7); low <sup>b</sup>   |
| Azathioprine             | Methotrexate               | 1 | 0 (-0.6, 0.6); moderate <sup>a</sup>     | 0.1 (-1.0, 1.2); moderate <sup>a</sup>  | 0 (-0.5, 0.6); moderate             |
| Azathioprine             | Placebo                    | 1 | -0.6 (-1.1, -0.2); moderate <sup>a</sup> | -0.7 (-1.8, 0.5); moderate <sup>a</sup> | -0.6 (-1.0, -0.2); moderate         |
| Azathioprine             | Tralokinumab               | 0 | --                                       | 0 (-0.5, 0.4); moderate <sup>a</sup>    | 0 (-0.5, 0.4); moderate             |
| Azathioprine             | Upadacitinib 15 mg daily   | 0 | --                                       | 0.5 (0.1, 0.9); moderate <sup>a</sup>   | 0.5 (0.1, 0.9); moderate            |
| Azathioprine             | Upadacitinib 30 mg daily   | 0 | --                                       | 0.8 (0.3, 1.2); moderate <sup>a</sup>   | 0.8 (0.3, 1.2); moderate            |
| Baricitinib 2 mg daily   | Baricitinib 4 mg daily     | 4 | 0.1 (0, 0.3); moderate*                  | --                                      | 0.1 (0, 0.3); moderate              |
| Baricitinib 2 mg daily   | Cyclosporine (higher dose) | 0 | --                                       | 0.7 (0, 1.3); moderate <sup>a</sup>     | 0.7 (0, 1.3); low <sup>b</sup>      |
| Baricitinib 2 mg daily   | Cyclosporine (lower dose)  | 0 | --                                       | 0.4 (-0.3, 1); moderate <sup>a</sup>    | 0.4 (-0.3, 1); low <sup>b</sup>     |
| Baricitinib 2 mg daily   | Dupilumab                  | 0 | --                                       | 0.5 (0.3, 0.7); high                    | 0.5 (0.3, 0.7); high                |
| Baricitinib 2 mg daily   | Methotrexate               | 0 | --                                       | 0.3 (-0.4, 0.9); moderate <sup>a</sup>  | 0.3 (-0.4, 0.9); low <sup>b</sup>   |
| Baricitinib 2 mg daily   | Placebo                    | 5 | -0.4 (-0.5, -0.2); high                  | --                                      | -0.4 (-0.5, -0.2); high             |
| Baricitinib 2 mg daily   | Tralokinumab               | 0 | --                                       | 0.2 (0, 0.4); high                      | 0.2 (0, 0.4); moderate <sup>b</sup> |

|                            |                            |   |                                         |                                          |                                    |
|----------------------------|----------------------------|---|-----------------------------------------|------------------------------------------|------------------------------------|
| Baricitinib 2 mg daily     | Upadacitinib 15 mg daily   | 0 | --                                      | 0.8 (0.6, 1); high                       | 0.8 (0.6, 1); high                 |
| Baricitinib 2 mg daily     | Upadacitinib 30 mg daily   | 0 | --                                      | 1 (0.8, 1.2); high                       | 1 (0.8, 1.2); high                 |
| Baricitinib 4 mg daily     | Cyclosporine (higher dose) | 0 | --                                      | 0.5 (-0.1, 1.1); moderate <sup>a</sup>   | 0.5 (-0.1, 1.1); low <sup>b</sup>  |
| Baricitinib 4 mg daily     | Cyclosporine (lower dose)  | 0 | --                                      | 0.2 (-0.4, 0.9); moderate <sup>a</sup>   | 0.2 (-0.4, 0.9); low <sup>b</sup>  |
| Baricitinib 4 mg daily     | Dupilumab                  | 0 | --                                      | 0.4 (0.2, 0.6); high                     | 0.4 (0.2, 0.6); high               |
| Baricitinib 4 mg daily     | Methotrexate               | 0 | --                                      | 0.1 (-0.5, 0.8); moderate <sup>a</sup>   | 0.1 (-0.5, 0.8); moderate          |
| Baricitinib 4 mg daily     | Placebo                    | 4 | -0.5 (-0.7, -0.4); high                 | --                                       | -0.5 (-0.7, -0.4); high            |
| Baricitinib 4 mg daily     | Tralokinumab               | 0 | --                                      | 0.1 (-0.1, 0.3); high                    | 0.1 (-0.1, 0.3); high              |
| Baricitinib 4 mg daily     | Upadacitinib 15 mg daily   | 0 | --                                      | 0.6 (0.4, 0.8); high                     | 0.6 (0.4, 0.8); high               |
| Baricitinib 4 mg daily     | Upadacitinib 30 mg daily   | 0 | --                                      | 0.9 (0.7, 1.1); high                     | 0.9 (0.7, 1.1); high               |
| Cyclosporine (higher dose) | Cyclosporine (lower dose)  | 1 | -0.3 (-0.7, 0.1); moderate <sup>a</sup> | -0.4 (-1.5, 0.8); moderate <sup>a</sup>  | -0.3 (-0.7, 0.1); low <sup>b</sup> |
| Cyclosporine (higher dose) | Dupilumab                  | 0 | --                                      | -0.2 (-0.8, 0.5); high                   | -0.2 (-0.8, 0.5); low <sup>b</sup> |
| Cyclosporine (higher dose) | Methotrexate               | 0 | --                                      | -0.4 (-0.9, 0.2); moderate <sup>a</sup>  | -0.4 (-0.9, 0.2); low <sup>b</sup> |
| Cyclosporine (higher dose) | Placebo                    | 1 | -1 (-1.8, -0.3); moderate <sup>a</sup>  | -1 (-2.1, 0); moderate <sup>a</sup>      | -1 (-1.6, -0.4); moderate          |
| Cyclosporine (higher dose) | Tralokinumab               | 0 | --                                      | -0.5 (-1.1, 0.2); moderate <sup>a</sup>  | -0.5 (-1.1, 0.2); low <sup>b</sup> |
| Cyclosporine (higher dose) | Upadacitinib 15 mg daily   | 0 | --                                      | 0.1 (-0.5, 0.7); moderate <sup>a</sup>   | 0.1 (-0.5, 0.7); moderate          |
| Cyclosporine (higher dose) | Upadacitinib 30 mg daily   | 0 | --                                      | 0.4 (-0.3, 1); moderate <sup>a</sup>     | 0.4 (-0.3, 1); low <sup>b</sup>    |
| Cyclosporine (lower dose)  | Dupilumab                  | 0 | --                                      | 0.2 (-0.5, 0.8); moderate <sup>a</sup>   | 0.2 (-0.5, 0.8); low <sup>b</sup>  |
| Cyclosporine (lower dose)  | Methotrexate               | 1 | -0.1 (-0.6, 0.5); moderate <sup>a</sup> | -0.1 (-1.2, 1.0); moderate <sup>a</sup>  | -0.1 (-0.6, 0.4); moderate         |
| Cyclosporine (lower dose)  | Placebo                    | 0 | --                                      | -0.7 (-1.4, -0.1); moderate <sup>a</sup> | -0.7 (-1.4, -0.1); moderate        |
| Cyclosporine (lower dose)  | Tralokinumab               | 0 | --                                      | -0.2 (-0.8, 0.5); moderate <sup>a</sup>  | -0.2 (-0.8, 0.5); low <sup>b</sup> |
| Cyclosporine (lower dose)  | Upadacitinib 15 mg daily   | 0 | --                                      | 0.4 (-0.2, 1); moderate <sup>a</sup>     | 0.4 (-0.2, 1); low <sup>b</sup>    |

|                           |                          |   |                         |                                         |                                    |
|---------------------------|--------------------------|---|-------------------------|-----------------------------------------|------------------------------------|
| Cyclosporine (lower dose) | Upadacitinib 30 mg daily | 0 | --                      | 0.7 (0, 1.3); moderate <sup>a</sup>     | 0.7 (0, 1.3); low <sup>b</sup>     |
| Dupilumab                 | Methotrexate             | 0 | --                      | -0.2 (-0.9, 0.4); moderate <sup>a</sup> | -0.2 (-0.9, 0.4); low <sup>b</sup> |
| Dupilumab                 | Placebo                  | 7 | -0.9 (-1, -0.8); high   | --                                      | -0.9 (-1, -0.8); high              |
| Dupilumab                 | Tralokinumab             | 0 | --                      | -0.3 (-0.5, -0.1); high                 | -0.3 (-0.5, -0.1); high            |
| Dupilumab                 | Upadacitinib 15 mg daily | 0 | --                      | 0.2 (0.1, 0.4); high                    | 0.2 (0.1, 0.4); high               |
| Dupilumab                 | Upadacitinib 30 mg daily | 0 | --                      | 0.5 (0.3, 0.7); high                    | 0.5 (0.3, 0.7); high               |
| Methotrexate              | Placebo                  | 0 | --                      | -0.6 (-1.3, 0); moderate <sup>a</sup>   | -0.6 (-1.3, 0); low <sup>b</sup>   |
| Methotrexate              | Tralokinumab             | 0 | --                      | -0.1 (-0.7, 0.6); moderate <sup>a</sup> | -0.1 (-0.7, 0.6); moderate         |
| Methotrexate              | Upadacitinib 15 mg daily | 0 | --                      | 0.5 (-0.1, 1.1); moderate <sup>a</sup>  | 0.5 (-0.1, 1.1); low <sup>b</sup>  |
| Methotrexate              | Upadacitinib 30 mg daily | 0 | --                      | 0.8 (0.1, 1.4); moderate <sup>a</sup>   | 0.8 (0.1, 1.4); moderate           |
| Tralokinumab              | Placebo                  | 3 | -0.6 (-0.7, -0.4); high | --                                      | -0.6 (-0.7, -0.4); high            |
| Tralokinumab              | Upadacitinib 15 mg daily | 0 | --                      | 0.6 (0.4, 0.7); high                    | 0.6 (0.4, 0.7); high               |
| Tralokinumab              | Upadacitinib 30 mg daily | 0 | --                      | 0.8 (0.6, 1); high                      | 0.8 (0.6, 1); high                 |
| Upadacitinib 15 mg daily  | Upadacitinib 30 mg daily | 4 | 0.3 (0.1, 0.4); high    | --                                      | 0.3 (0.1, 0.4); high               |
| Upadacitinib 15 mg daily  | Placebo                  | 4 | -1.1 (-1.3, -1); high   | --                                      | -1.1 (-1.3, -1); high              |
| Upadacitinib 30 mg daily  | Placebo                  | 4 | -1.4 (-1.5, -1.3); high | --                                      | -1.4 (-1.5, -1.3); high            |

Dose of dupilumab and tralokinumab is 600 mg then 300 mg every 2 weeks

The network meta-analysis certainty ratings start at the higher of the direct or indirect ratings and can then be rated down further for incoherence (based on the results of node splitting analyses) and imprecision.

\* Rated down for inconsistency

a. Rated down for significant issues related to risk of bias in included trials

b. Rated down for imprecision

**eFigure 2.** Network graphs of studies included in the analysis of adults treated between 8 and 16 weeks for change in quality of life on the standardized mean difference scale. The width of each line connecting two treatments (nodes) is proportional to the number of head-to-head trials for that comparison.

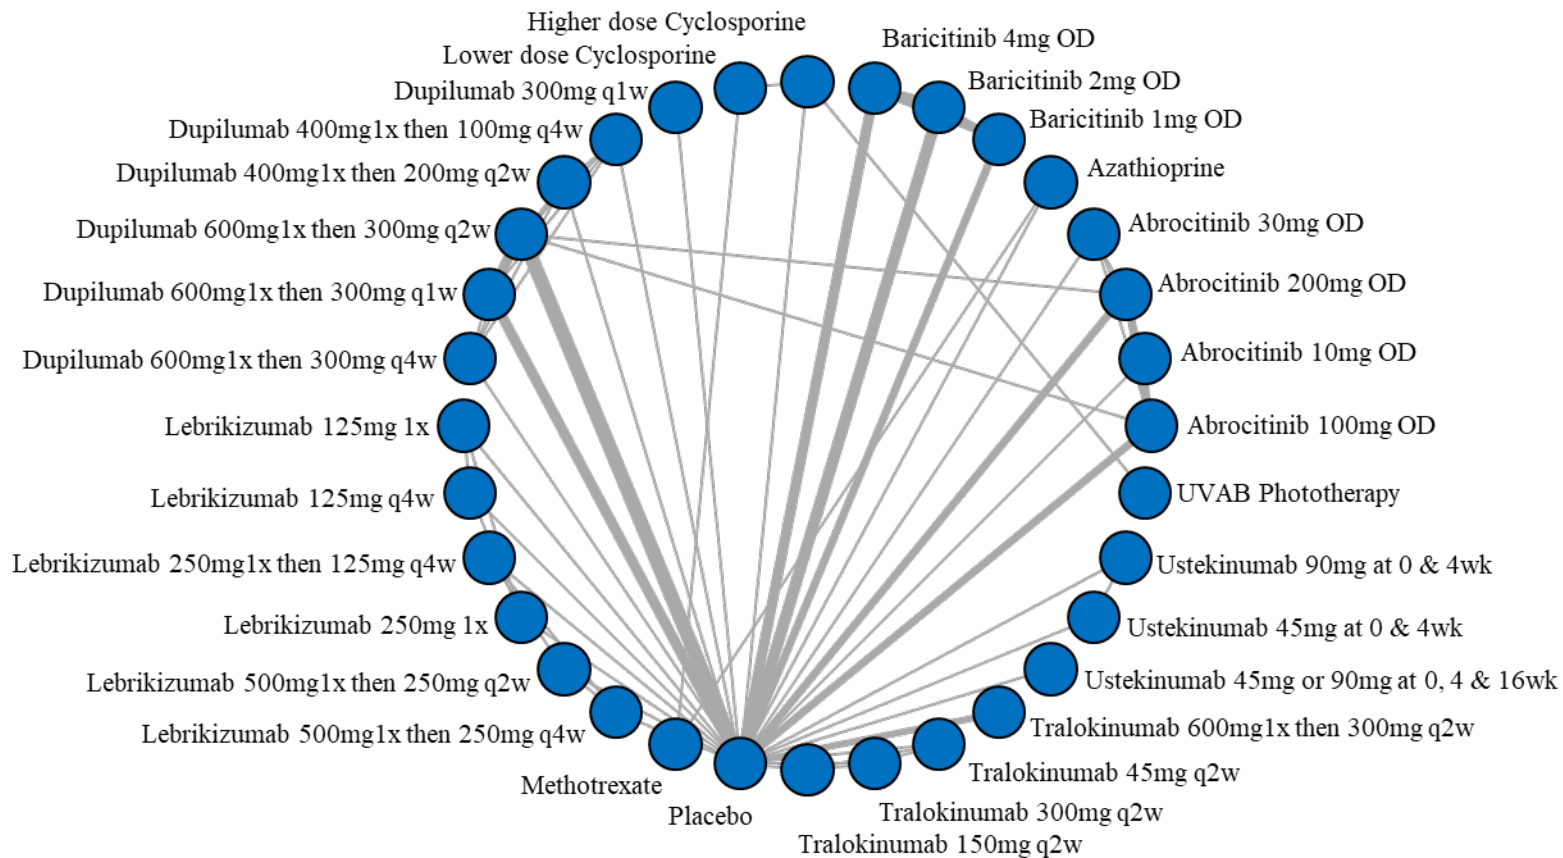

OD: once daily; q1w: once weekly; q2w: every 2 weeks; q4w: every 4 weeks.

**eTable 12.** League table with relative effect estimates for change in quality of life up to 16 weeks of treatment in adults for placebo and medications used in clinical practice or likely to be approved soon. Results for other pairwise comparisons in the network can be requested from the authors. Results are presented as change in standardized mean difference of quality of life scales (95% CrI). A positive effect estimate in a given cell favors the row-defining treatment. A negative effect estimate in a given cell favors the column-defining treatment. The bottom row contains the Surface Under the Cumulative Ranking (SUCRA) value for the column-defining treatment.

|                            | Abrocitinib 100 mg daily | Abrocitinib 200 mg daily | Azathioprine     | Baricitinib 2 mg daily | Baricitinib 4 mg daily | Cyclosporine (higher dose) | Cyclosporine (lower dose) | Dupilumab*        | Methotrexate     | Placebo         | Tralokinumab*     |
|----------------------------|--------------------------|--------------------------|------------------|------------------------|------------------------|----------------------------|---------------------------|-------------------|------------------|-----------------|-------------------|
| Abrocitinib 100 mg daily   |                          | -0.3 (-0.5, -0.2)        | 0.2 (-0.4, 0.7)  | 0.2 (0, 0.4)           | 0 (-0.3, 0.2)          | -0.1 (-0.8, 0.5)           | 0.1 (-0.6, 0.8)           | -0.3 (-0.4, -0.1) | 0.2 (-0.5, 0.8)  | 0.6 (0.4, 0.7)  | 0.2 (-0.1, 0.4)   |
| Abrocitinib 200 mg daily   | 0.3 (0.2, 0.5)           |                          | 0.5 (0, 1.1)     | 0.5 (0.3, 0.8)         | 0.3 (0, 0.5)           | 0.2 (-0.4, 0.8)            | 0.4 (-0.3, 1.1)           | 0.1 (-0.1, 0.3)   | 0.5 (-0.2, 1.2)  | 0.9 (0.7, 1.1)  | 0.5 (0.3, 0.7)    |
| Azathioprine               | -0.2 (-0.7, 0.4)         | -0.5 (-1.1, 0)           |                  | 0 (-0.5, 0.6)          | -0.2 (-0.8, 0.3)       | -0.3 (-1, 0.3)             | -0.1 (-0.7, 0.6)          | -0.4 (-1, 0.1)    | 0 (-0.6, 0.5)    | 0.4 (-0.1, 0.9) | 0 (-0.6, 0.5)     |
| Baricitinib 2 mg daily     | -0.2 (-0.4, 0)           | -0.5 (-0.8, -0.3)        | 0 (-0.6, 0.5)    |                        | -0.3 (-0.4, -0.1)      | -0.3 (-1, 0.3)             | -0.1 (-0.8, 0.5)          | -0.5 (-0.7, -0.3) | 0 (-0.7, 0.6)    | 0.4 (0.2, 0.5)  | 0 (-0.3, 0.2)     |
| Baricitinib 4 mg daily     | 0 (-0.2, 0.3)            | -0.3 (-0.5, 0)           | 0.2 (-0.3, 0.8)  | 0.3 (0.1, 0.4)         |                        | -0.1 (-0.7, 0.5)           | 0.1 (-0.5, 0.8)           | -0.2 (-0.4, 0)    | 0.2 (-0.5, 0.9)  | 0.6 (0.4, 0.8)  | 0.2 (0, 0.4)      |
| Cyclosporine (higher dose) | 0.1 (-0.5, 0.8)          | -0.2 (-0.8, 0.4)         | 0.3 (-0.3, 1)    | 0.3 (-0.3, 1)          | 0.1 (-0.5, 0.7)        |                            | 0.2 (-0.2, 0.6)           | -0.1 (-0.7, 0.5)  | 0.3 (-0.3, 0.9)  | 0.7 (0.1, 1.3)  | 0.3 (-0.3, 0.9)   |
| Cyclosporine (lower dose)  | -0.1 (-0.8, 0.6)         | -0.4 (-1.1, 0.3)         | 0.1 (-0.6, 0.7)  | 0.1 (-0.5, 0.8)        | -0.1 (-0.8, 0.5)       | -0.2 (-0.6, 0.2)           |                           | -0.3 (-1, 0.3)    | 0.1 (-0.4, 0.6)  | 0.5 (-0.2, 1.1) | 0.1 (-0.6, 0.8)   |
| Dupilumab*                 | 0.3 (0.1, 0.4)           | -0.1 (-0.3, 0.1)         | 0.4 (-0.1, 1)    | 0.5 (0.3, 0.7)         | 0.2 (0, 0.4)           | 0.1 (-0.5, 0.7)            | 0.3 (-0.3, 1)             |                   | 0.4 (-0.3, 1.1)  | 0.8 (0.7, 0.9)  | 0.4 (0.2, 0.6)    |
| Methotrexate               | -0.2 (-0.8, 0.5)         | -0.5 (-1.2, 0.2)         | 0 (-0.5, 0.6)    | 0 (-0.6, 0.7)          | -0.2 (-0.9, 0.5)       | -0.3 (-0.9, 0.3)           | -0.1 (-0.6, 0.4)          | -0.4 (-1.1, 0.3)  |                  | 0.4 (-0.3, 1.1) | 0 (-0.7, 0.7)     |
| Placebo                    | -0.6 (-0.7, -0.4)        | -0.9 (-1.1, -0.7)        | -0.4 (-0.9, 0.1) | -0.4 (-0.5, -0.2)      | -0.6 (-0.8, -0.4)      | -0.7 (-1.3, -0.1)          | -0.5 (-1.1, 0.2)          | -0.8 (-0.9, -0.7) | -0.4 (-1.1, 0.3) |                 | -0.4 (-0.6, -0.3) |
| Tralokinumab*              | -0.2 (-0.4, 0.1)         | -0.5 (-0.7, -0.3)        | 0 (-0.5, 0.6)    | 0 (-0.2, 0.3)          | -0.2 (-0.4, 0)         | -0.3 (-0.9, 0.3)           | -0.1 (-0.8, 0.6)          | -0.4 (-0.6, -0.2) | 0 (-0.7, 0.7)    | 0.4 (0.3, 0.6)  |                   |
| SUCRA                      | 0.70                     | 0.93                     | 0.53             | 0.51                   | 0.74                   | 0.78                       | 0.60                      | 0.88              | 0.53             | 0.18            | 0.56              |

\*Dose of dupilumab and tralokinumab is 600 mg then 300 mg every 2 weeks

**eTable 13.** GRADE certainty ratings for change in the standardized mean difference of quality of life up to 16 weeks of treatment in adults for placebo and medications used in clinical practice or likely to be approved soon. Results are presented standardized mean difference (95% CrI). Negative effect estimates favor the treatment listed in the intervention column; positive effect estimates favor the comparator.

| Intervention             | Comparator                 | Head-to-head trials, n | Direct estimate (95% CrI); Certainty of Evidence | Indirect estimate (95% CrI); Certainty of Evidence | NMA Estimate (95% CrI); Certainty of Evidence |
|--------------------------|----------------------------|------------------------|--------------------------------------------------|----------------------------------------------------|-----------------------------------------------|
| Abrocitinib 100 mg daily | Abrocitinib 200 mg daily   | 4                      | 0.3 (0.2, 0.5); moderate*                        | --                                                 | 0.3 (0.2, 0.5); moderate                      |
| Abrocitinib 100 mg daily | Azathioprine               | 0                      | --                                               | -0.2 (-0.7, 0.4); moderate <sup>a</sup>            | -0.2 (-0.7, 0.4); low <sup>b</sup>            |
| Abrocitinib 100 mg daily | Baricitinib 2 mg daily     | 0                      | --                                               | -0.2 (-0.4, 0); high                               | -0.2 (-0.4, 0); moderate <sup>b</sup>         |
| Abrocitinib 100 mg daily | Baricitinib 4 mg daily     | 0                      | --                                               | 0 (-0.2, 0.3); high                                | 0 (-0.2, 0.3); high                           |
| Abrocitinib 100 mg daily | Cyclosporine (higher dose) | 0                      | --                                               | 0.1 (-0.5, 0.8); moderate <sup>a</sup>             | 0.1 (-0.5, 0.8); low <sup>b</sup>             |
| Abrocitinib 100 mg daily | Cyclosporine (lower dose)  | 0                      | --                                               | -0.1 (-0.8, 0.6); moderate <sup>a</sup>            | -0.1 (-0.8, 0.6); low <sup>b</sup>            |
| Abrocitinib 100 mg daily | Dupilumab                  | 1                      | 0.4 (0.1, 0.6); high                             | 0.2 (-0.1, 0.4); high                              | 0.3 (0.1, 0.4); high                          |
| Abrocitinib 100 mg daily | Methotrexate               | 0                      | --                                               | 0.2 (-0.8, 0.5); moderate <sup>a</sup>             | -0.2 (-0.8, 0.5); low <sup>b</sup>            |
| Abrocitinib 100 mg daily | Placebo                    | 4                      | -0.6 (-0.7, -0.4); high                          | --                                                 | -0.6 (-0.7, -0.4); high                       |
| Abrocitinib 100 mg daily | Tralokinumab               | 0                      | --                                               | -0.2 (-0.4, 0.1); high                             | -0.2 (-0.4, 0.1); moderate <sup>b</sup>       |
| Abrocitinib 200 mg daily | Azathioprine               | 0                      | --                                               | -0.5 (-1.1, 0); moderate <sup>a</sup>              | -0.5 (-1.1, 0); low <sup>b</sup>              |
| Abrocitinib 200 mg daily | Baricitinib 2 mg daily     | 0                      | --                                               | -0.5 (-0.8, -0.3); high                            | -0.5 (-0.8, -0.3); high                       |
| Abrocitinib 200 mg daily | Baricitinib 4 mg daily     | 0                      | --                                               | -0.3 (-0.5, 0); high                               | -0.3 (-0.5, 0); moderate <sup>b</sup>         |
| Abrocitinib 200 mg daily | Cyclosporine (higher dose) | 0                      | --                                               | -0.2 (-0.8, 0.4); moderate <sup>a</sup>            | -0.2 (-0.8, 0.4); low <sup>b</sup>            |
| Abrocitinib 200 mg daily | Cyclosporine (lower dose)  | 0                      | --                                               | -0.4 (-1.1, 0.3); moderate <sup>a</sup>            | -0.4 (-1.1, 0.3); low <sup>b</sup>            |



|                          |                            |   |                                        |                                         |                                    |
|--------------------------|----------------------------|---|----------------------------------------|-----------------------------------------|------------------------------------|
| Abrocitinib 200 mg daily | Dupilumab                  | 1 | -0.2 (-0.4, 0); high                   | 0 (-3, 3); high                         | -0.1 (-0.3, 0.1); high             |
| Abrocitinib 200 mg daily | Methotrexate               | 0 | --                                     | -0.5 (-1.2, 0.2); moderate <sup>a</sup> | -0.5 (-1.2, 0.2); low <sup>b</sup> |
| Abrocitinib 200 mg daily | Placebo                    | 4 | -0.9 (-1.1, -0.7); high                | --                                      | -0.9 (-1.1, -0.7); high            |
| Abrocitinib 200 mg daily | Tralokinumab               | 0 | --                                     | -0.5 (-0.7, -0.3); high                 | -0.5 (-0.7, -0.3); high            |
| Azathioprine             | Baricitinib 2 mg daily     | 0 | --                                     | 0 (-0.6, 0.5); moderate <sup>a</sup>    | 0 (-0.6, 0.5); moderate            |
| Azathioprine             | Baricitinib 4 mg daily     | 0 | --                                     | 0.2 (-0.3, 0.8); moderate <sup>a</sup>  | 0.2 (-0.3, 0.8); low <sup>b</sup>  |
| Azathioprine             | Cyclosporine (higher dose) | 0 | --                                     | 0.3 (-0.3, 1); moderate <sup>a</sup>    | 0.3 (-0.3, 1); low <sup>b</sup>    |
| Azathioprine             | Cyclosporine (lower dose)  | 0 | --                                     | 0.1 (-0.6, 0.7); moderate <sup>a</sup>  | 0.1 (-0.6, 0.7); moderate          |
| Azathioprine             | Dupilumab                  | 0 | --                                     | 0.4 (-0.1, 1); moderate <sup>a</sup>    | 0.4 (-0.1, 1); low <sup>b</sup>    |
| Azathioprine             | Methotrexate               | 1 | 0.2 (-0.4, 0.9); moderate <sup>a</sup> | -0.7 (-1.9, 0.4); moderate <sup>a</sup> | 0 (-0.5, 0.6); moderate            |
| Azathioprine             | Placebo                    | 1 | -0.6 (-1.2, 0); moderate <sup>a</sup>  | 0.4 (-0.8, 1.6); moderate <sup>a</sup>  | -0.4 (-0.9, 0.1); low <sup>b</sup> |
| Azathioprine             | Tralokinumab               | 0 | --                                     | 0 (-0.5, 0.6); moderate <sup>a</sup>    | 0 (-0.5, 0.6); moderate            |
| Baricitinib 2 mg daily   | Baricitinib 4 mg daily     | 5 | 0.3 (0.1, 0.4); high                   | --                                      | 0.3 (0.1, 0.4); high               |
| Baricitinib 2 mg daily   | Cyclosporine (higher dose) | 0 | --                                     | 0.3 (-0.3, 1); moderate <sup>a</sup>    | 0.3 (-0.3, 1); low <sup>b</sup>    |
| Baricitinib 2 mg daily   | Cyclosporine (lower dose)  | 0 | --                                     | 0.1 (-0.5, 0.8); moderate <sup>a</sup>  | 0.1 (-0.5, 0.8); low <sup>b</sup>  |
| Baricitinib 2 mg daily   | Dupilumab                  | 0 | --                                     | 0.5 (0.3, 0.7); high                    | 0.5 (0.3, 0.7); high               |
| Baricitinib 2 mg daily   | Methotrexate               | 0 | --                                     | 0 (-0.6, 0.7); moderate <sup>a</sup>    | 0 (-0.6, 0.7); moderate            |
| Baricitinib 2 mg daily   | Placebo                    | 6 | -0.4 (-0.5, -0.2); high                | --                                      | -0.4 (-0.5, -0.2); high            |
| Baricitinib 2 mg daily   | Tralokinumab               | 0 | --                                     | 0 (-0.2, 0.3); high                     | 0 (-0.2, 0.3); high                |
| Baricitinib 4 mg daily   | Cyclosporine (higher dose) | 0 | --                                     | 0.1 (-0.5, 0.7); moderate <sup>a</sup>  | 0.1 (-0.5, 0.7); moderate          |
| Baricitinib 4 mg daily   | Cyclosporine (lower dose)  | 0 | --                                     | -0.1 (-0.8, 0.5); moderate <sup>a</sup> | -0.1 (-0.8, 0.5); low <sup>b</sup> |

|                            |                           |   |                                         |                                         |                                       |
|----------------------------|---------------------------|---|-----------------------------------------|-----------------------------------------|---------------------------------------|
| Baricitinib 4 mg daily     | Dupilumab                 | 0 | --                                      | 0.2 (0, 0.4); high                      | 0.2 (0, 0.4); moderate <sup>b</sup>   |
| Baricitinib 4 mg daily     | Methotrexate              | 0 | --                                      | -0.2 (-0.9, 0.5); moderate <sup>a</sup> | -0.2 (-0.9, 0.5); low <sup>b</sup>    |
| Baricitinib 4 mg daily     | Placebo                   | 5 | -0.6 (-0.8, -0.4); high                 | --                                      | -0.6 (-0.8, -0.4); high               |
| Baricitinib 4 mg daily     | Tralokinumab              | 0 | --                                      | -0.6 (-0.8, -0.4); high                 | -0.2 (-0.4, 0); moderate <sup>b</sup> |
| Cyclosporine (higher dose) | Cyclosporine (lower dose) | 1 | -0.3 (-0.8, 0.1); moderate <sup>a</sup> | 0.6 (-0.6, 1.9); moderate <sup>a</sup>  | -0.2 (-0.6, 0.2); low <sup>b</sup>    |
| Cyclosporine (higher dose) | Dupilumab                 | 0 | --                                      | 0.1 (-0.5, 0.7); moderate <sup>a</sup>  | 0.1 (-0.5, 0.7); moderate             |
| Cyclosporine (higher dose) | Methotrexate              | 0 | --                                      | -0.3 (-0.9, 0.3); moderate <sup>a</sup> | -0.3 (-0.9, 0.3); low <sup>b</sup>    |
| Cyclosporine (higher dose) | Placebo                   | 1 | -0.4 (-1.1, 0.3); moderate <sup>a</sup> | -1.4 (-2.5, 0.3); moderate <sup>a</sup> | -0.7 (-1.3, -0.1); moderate           |
| Cyclosporine (higher dose) | Tralokinumab              | 0 | --                                      | -0.3 (-0.9, 0.3); moderate <sup>a</sup> | -0.3 (-0.9, 0.3); low <sup>b</sup>    |
| Cyclosporine (lower dose)  | Dupilumab                 | 0 | --                                      | 0.3 (-0.3, 1); moderate <sup>a</sup>    | 0.3 (-0.3, 1); low <sup>b</sup>       |
| Cyclosporine (lower dose)  | Methotrexate              | 1 | -0.2 (-0.8, 0.3); moderate <sup>a</sup> | 0.7 (-0.5, 1.9); moderate <sup>a</sup>  | -0.1 (-0.6, 0.4); moderate            |
| Cyclosporine (lower dose)  | Placebo                   | 0 | --                                      | -0.5 (-1.1, 0.2); moderate <sup>a</sup> | -0.5 (-1.1, 0.2); low <sup>b</sup>    |
| Cyclosporine (lower dose)  | Tralokinumab              | 0 | --                                      | -0.1 (-0.8, 0.6); moderate <sup>a</sup> | -0.1 (-0.8, 0.6); low <sup>b</sup>    |
| Dupilumab                  | Methotrexate              | 0 | --                                      | -0.4 (-1.1, 0.3); moderate <sup>a</sup> | -0.4 (-1.1, 0.3); low <sup>b</sup>    |
| Dupilumab                  | Placebo                   | 7 | -0.8 (-0.9, -0.7); high                 | --                                      | -0.8 (-0.9, -0.7); high               |
| Dupilumab                  | Tralokinumab              | 0 | --                                      | -0.4 (-0.6, -0.2); high                 | -0.4 (-0.6, -0.2); high               |
| Methotrexate               | Placebo                   | 0 | --                                      | -0.4 (-1.1, 0.3); moderate <sup>a</sup> | -0.4 (-1.1, 0.3); low <sup>b</sup>    |
| Methotrexate               | Tralokinumab              | 0 | --                                      | 0 (-0.7, 0.7); moderate <sup>a</sup>    | 0 (-0.7, 0.7); moderate               |
| Tralokinumab               | Placebo                   | 3 | -0.4 (-0.6, -0.3); high                 | --                                      | -0.4 (-0.6, -0.3); high               |

Dose of dupilumab and tralokinumab is 600 mg then 300 mg every 2 weeks

The network meta-analysis certainty ratings start at the higher of the direct or indirect ratings and can then be rated down further for incoherence (based on the results of node splitting analyses) and imprecision.

- \* Rated down for significant issues related to inconsistency in head-to-head trials
  - a. Rated down for significant issues related to risk of bias in included trials
  - b. Rated down for imprecision

**eFigure 3.** Network graphs of studies included in the analysis of adults treated between 8 and 16 weeks for change in itch on the standardized mean difference scale. The width of each line connecting two treatments (nodes) is proportional to the number of head-to-head trials for that comparison.

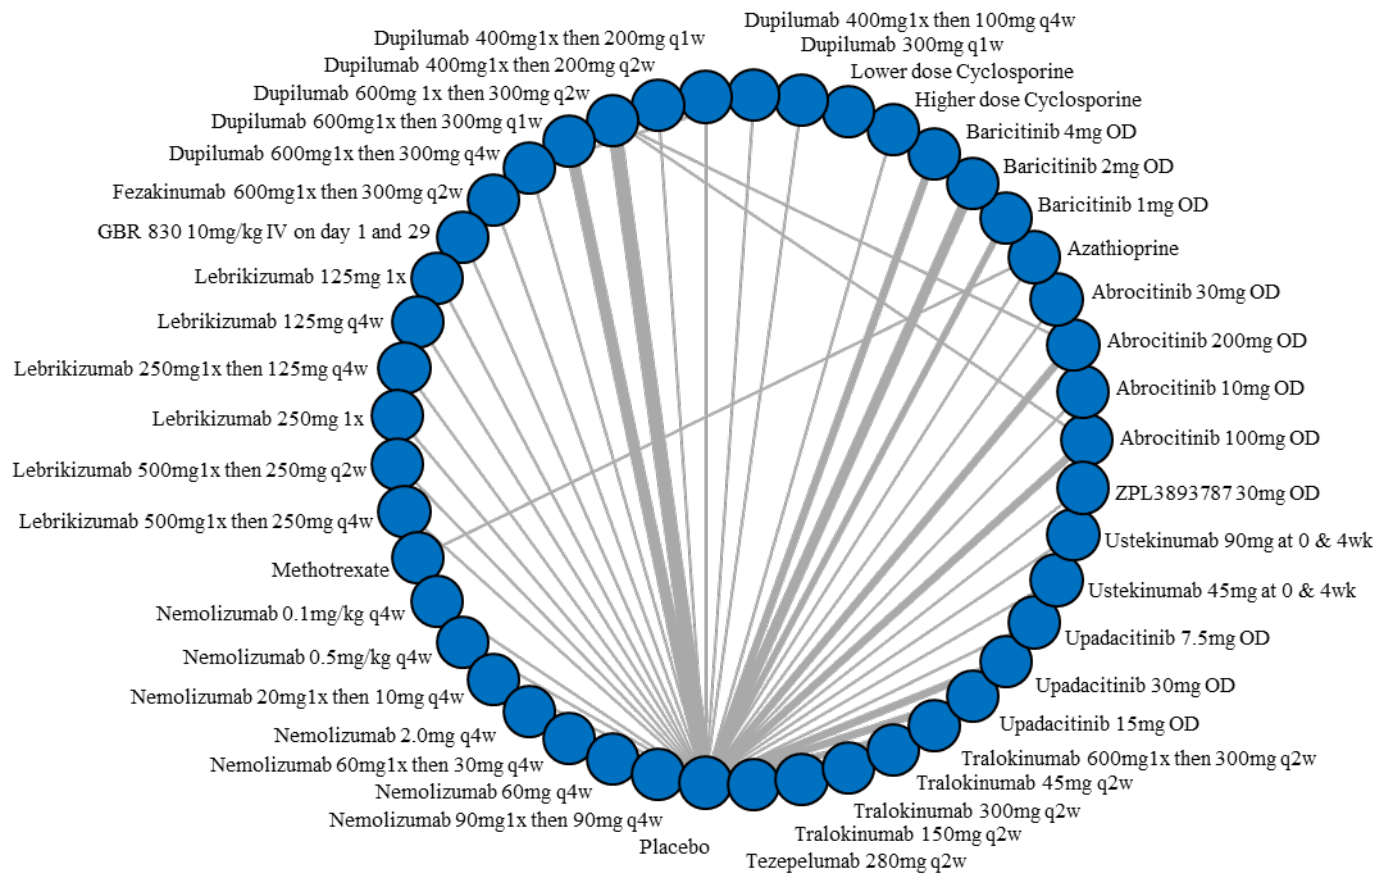

OD: once daily; q1w: once weekly; q2w: every 2 weeks; q4w: every 4 weeks.

**eTable 14.** League table with relative effect estimates for change in itch up to 16 weeks of treatment in adults for placebo and medications used in clinical practice or likely to be approved soon. Results for other pairwise comparisons in the network can be requested from the authors. Results are presented as change in standardized mean difference of itch scales (95% CrI). A positive effect estimate in a given cell favors the row-defining treatment. A negative effect estimate in a given cell favors the column-defining treatment. The bottom row contains the Surface Under the Cumulative Ranking (SUCRA) value for the column-defining treatment.

|                            | Abrocitinib 100 mg daily | Abrocitinib 200 mg daily | Azathioprine     | Baricitinib 2 mg daily | Baricitinib 4 mg daily | Cyclosporine (higher dose) | Cyclosporine (lower dose) | Dupilumab*        | Methotrexate     | Placebo         | Tralokinumab*     | Upadacitinib 15 mg daily | Upadacitinib 30 mg daily |
|----------------------------|--------------------------|--------------------------|------------------|------------------------|------------------------|----------------------------|---------------------------|-------------------|------------------|-----------------|-------------------|--------------------------|--------------------------|
| Abrocitinib 100 mg daily   |                          | -0.3 (-0.5, -0.2)        | 0 (-0.7, 0.6)    | 0 (-0.2, 0.3)          | -0.1 (-0.3, 0.2)       | -0.2 (-1, 0.7)             | -0.1 (-1.1, 0.8)          | -0.3 (-0.5, -0.1) | 0 (-0.9, 0.9)    | 0.5 (0.4, 0.7)  | 0.1 (-0.1, 0.3)   | -0.2 (-0.4, 0)           | -0.5 (-0.7, -0.3)        |
| Abrocitinib 200 mg daily   | 0.3 (0.2, 0.5)           |                          | 0.3 (-0.4, 0.9)  | 0.4 (0.1, 0.6)         | 0.2 (0, 0.5)           | 0.2 (-0.7, 1)              | 0.2 (-0.8, 1.1)           | 0 (-0.1, 0.2)     | 0.3 (-0.5, 1.2)  | 0.9 (0.7, 1)    | 0.4 (0.2, 0.6)    | 0.1 (-0.1, 0.4)          | -0.2 (-0.4, 0.1)         |
| Azathioprine               | 0 (-0.6, 0.7)            | -0.3 (-0.9, 0.4)         |                  | 0.1 (-0.5, 0.7)        | 0 (-0.7, 0.6)          | -0.1 (-1.1, 1)             | -0.1 (-1.2, 1.1)          | -0.2 (-0.8, 0.4)  | 0 (-0.6, 0.7)    | 0.6 (0, 1.2)    | 0.1 (-0.5, 0.8)   | -0.2 (-0.8, 0.5)         | -0.4 (-1.1, 0.2)         |
| Baricitinib 2 mg daily     | 0 (-0.3, 0.2)            | -0.4 (-0.6, -0.1)        | -0.1 (-0.7, 0.5) |                        | -0.1 (-0.3, 0.1)       | -0.2 (-1.1, 0.7)           | -0.2 (-1.1, 0.8)          | -0.3 (-0.5, -0.1) | 0 (-0.9, 0.8)    | 0.5 (0.3, 0.7)  | 0.1 (-0.2, 0.3)   | -0.2 (-0.5, 0)           | -0.5 (-0.8, -0.3)        |
| Baricitinib 4 mg daily     | 0.1 (-0.2, 0.3)          | -0.2 (-0.5, 0)           | 0 (-0.6, 0.7)    | 0.1 (-0.1, 0.3)        |                        | -0.1 (-0.9, 0.8)           | -0.1 (-1, 0.9)            | -0.2 (-0.4, 0)    | 0.1 (-0.8, 1)    | 0.6 (0.4, 0.8)  | 0.2 (-0.1, 0.4)   | -0.1 (-0.4, 0.1)         | -0.4 (-0.7, -0.2)        |
| Cyclosporine (higher dose) | 0.2 (-0.7, 1)            | -0.2 (-1, 0.7)           | 0.1 (-1, 1.1)    | 0.2 (-0.7, 1.1)        | 0.1 (-0.8, 0.9)        |                            | 0 (-0.4, 0.4)             | -0.1 (-1, 0.7)    | 0.2 (-1.1, 1.4)  | 0.7 (-0.2, 1.5) | 0.3 (-0.6, 1.1)   | 0 (-0.9, 0.8)            | -0.3 (-1.2, 0.5)         |
| Cyclosporine (lower dose)  | 0.1 (-0.8, 1.1)          | -0.2 (-1.1, 0.8)         | 0.1 (-1.1, 1.2)  | 0.2 (-0.8, 1.1)        | 0.1 (-0.9, 1)          | 0 (-0.4, 0.4)              |                           | -0.1 (-1.1, 0.8)  | 0.2 (-1.2, 1.4)  | 0.7 (-0.3, 1.6) | 0.2 (-0.7, 1.2)   | -0.1 (-1, 0.9)           | -0.3 (-1.3, 0.6)         |
| Dupilumab*                 | 0.3 (0.1, 0.5)           | 0 (-0.2, 0.1)            | 0.2 (-0.4, 0.8)  | 0.3 (0.1, 0.5)         | 0.2 (0, 0.4)           | 0.1 (-0.7, 1)              | 0.1 (-0.8, 1.1)           |                   | 0.3 (-0.6, 1.2)  | 0.8 (0.7, 0.9)  | 0.4 (0.2, 0.6)    | 0.1 (-0.1, 0.3)          | -0.2 (-0.4, 0)           |
| Methotrexate               | 0 (-0.9, 0.9)            | -0.3 (-1.2, 0.5)         | 0 (-0.7, 0.6)    | 0 (-0.8, 0.9)          | -0.1 (-1, 0.8)         | -0.2 (-1.4, 1.1)           | -0.2 (-1.4, 1.2)          | -0.3 (-1.2, 0.6)  |                  | 0.5 (-0.3, 1.4) | 0.1 (-0.8, 1)     | -0.2 (-1.1, 0.7)         | -0.5 (-1.4, 0.4)         |
| Placebo                    | -0.5 (-0.7, -0.4)        | -0.9 (-1, -0.7)          | -0.6 (-1.2, 0)   | -0.5 (-0.7, -0.3)      | -0.6 (-0.8, -0.4)      | -0.7 (-1.5, 0.2)           | -0.7 (-1.6, 0.3)          | -0.8 (-0.9, -0.7) | -0.5 (-1.4, 0.3) |                 | -0.4 (-0.6, -0.3) | -0.7 (-0.9, -0.6)        | -1 (-1.2, -0.9)          |
| Tralokinumab*              | -0.1 (-0.3, 0.1)         | -0.4 (-0.6, -0.2)        | -0.1 (-0.8, 0.5) | -0.1 (-0.3, 0.2)       | -0.2 (-0.4, 0.1)       | -0.3 (-1.1, 0.6)           | -0.2 (-1.2, 0.7)          | -0.4 (-0.6, -0.2) | -0.1 (-1, 0.8)   | 0.4 (0.3, 0.6)  |                   | -0.3 (-0.5, -0.1)        | -0.6 (-0.8, -0.4)        |
| Upadacitinib 15 mg daily   | 0.2 (0, 0.4)             | -0.1 (-0.4, 0.1)         | 0.2 (-0.5, 0.8)  | 0.2 (0, 0.5)           | 0.1 (-0.1, 0.4)        | 0 (-0.8, 0.9)              | 0.1 (-0.9, 1)             | -0.1 (-0.3, 0.1)  | 0.2 (-0.7, 1.1)  | 0.7 (0.6, 0.9)  | 0.3 (0.1, 0.5)    |                          | -0.3 (-0.4, -0.1)        |
| Upadacitinib 30 mg daily   | 0.5 (0.3, 0.7)           | 0.2 (-0.1, 0.4)          | 0.4 (-0.2, 1.1)  | 0.5 (0.3, 0.8)         | 0.4 (0.2, 0.7)         | 0.3 (-0.5, 1.2)            | 0.3 (-0.6, 1.3)           | 0.2 (0, 0.4)      | 0.5 (-0.4, 1.4)  | 1 (0.9, 1.2)    | 0.6 (0.4, 0.8)    | 0.3 (0.1, 0.4)           |                          |
| SUCRA                      | 0.46                     | 0.73                     | 0.50             | 0.43                   | 0.53                   | 0.58                       | 0.56                      | 0.69              | 0.47             | 0.12            | 0.38              | 0.62                     | 0.83                     |

\*Dose of dupilumab and tralokinumab is 600 mg then 300 mg every 2 weeks

**eTable 15.** GRADE certainty ratings for change in the standardized mean difference of itch up to 16 weeks of treatment in adults for placebo and medications used in clinical practice or likely to be approved soon. Results are presented standardized mean difference (95% CrI). Negative effect estimates favor the treatment listed in the intervention column; positive effect estimates favor the comparator.

| Intervention             | Comparator                 | Head-to-head trials, n | Direct estimate (95% CrI); Certainty of Evidence | Indirect estimate (95% CrI); Certainty of Evidence | NMA Estimate (95% CrI); Certainty of Evidence |
|--------------------------|----------------------------|------------------------|--------------------------------------------------|----------------------------------------------------|-----------------------------------------------|
| Abrocitinib 100 mg daily | Abrocitinib 200 mg daily   | 4                      | 0.3 (0.2, 0.5); high                             | --                                                 | 0.3 (0.2, 0.5); high                          |
| Abrocitinib 100 mg daily | Azathioprine               | 0                      | --                                               | 0 (-0.6, 0.7); moderate <sup>a</sup>               | 0 (-0.6, 0.7); moderate <sup>b</sup>          |
| Abrocitinib 100 mg daily | Baricitinib 2 mg daily     | 0                      | --                                               | 0 (-0.3, 0.2); high                                | 0 (-0.3, 0.2); high                           |
| Abrocitinib 100 mg daily | Baricitinib 4 mg daily     | 0                      | --                                               | 0.1 (-0.2, 0.3); high                              | 0.1 (-0.2, 0.3); high                         |
| Abrocitinib 100 mg daily | Cyclosporine (higher dose) | 0                      | --                                               | 0.2 (-0.7, 1); moderate <sup>a</sup>               | 0.2 (-0.7, 1); low <sup>b</sup>               |
| Abrocitinib 100 mg daily | Cyclosporine (lower dose)  | 0                      | --                                               | 0.1 (-0.8, 1.1); moderate <sup>a</sup>             | 0.1 (-0.8, 1.1); low <sup>b</sup>             |
| Abrocitinib 100 mg daily | Dupilumab                  | 1                      | 0.3 (0.1, 0.5); high                             | 0.3 (0, 0.5); high                                 | 0.3 (0.1, 0.5); high                          |
| Abrocitinib 100 mg daily | Methotrexate               | 0                      | --                                               | 0 (-0.9, 0.9); moderate <sup>a</sup>               | 0 (-0.9, 0.9); low <sup>b</sup>               |
| Abrocitinib 100 mg daily | Placebo                    | 4                      | -0.5 (-0.7, -0.4); high                          | --                                                 | -0.5 (-0.7, -0.4); high                       |
| Abrocitinib 100 mg daily | Tralokinumab               | 0                      | --                                               | -0.1 (-0.3, 0.1); high                             | -0.1 (-0.3, 0.1); high                        |
| Abrocitinib 100 mg daily | Upadacitinib 15 mg daily   | 0                      | --                                               | 0.2 (0, 0.4); high                                 | 0.2 (0, 0.4); moderate <sup>b</sup>           |
| Abrocitinib 100 mg daily | Upadacitinib 30 mg daily   | 0                      | --                                               | 0.5 (0.3, 0.7); high                               | 0.5 (0.3, 0.7); high                          |
| Abrocitinib 200 mg daily | Azathioprine               | 0                      | --                                               | -0.3 (-0.9, 0.4); moderate <sup>a</sup>            | -0.3 (-0.9, 0.4); low <sup>b</sup>            |
| Abrocitinib 200 mg daily | Baricitinib 2 mg daily     | 0                      | --                                               | -0.4 (-0.6, -0.1); high                            | -0.4 (-0.6, -0.1); high                       |
| Abrocitinib 200 mg daily | Baricitinib 4 mg daily     | 0                      | --                                               | -0.2 (-0.5, 0); high                               | -0.2 (-0.5, 0); moderate <sup>b</sup>         |
| Abrocitinib 200 mg daily | Cyclosporine (higher dose) | 0                      | --                                               | -0.2 (-1, 0.7); moderate <sup>a</sup>              | -0.2 (-1, 0.7); low <sup>b</sup>              |

|                          |                            |   |                                       |                                         |                                        |
|--------------------------|----------------------------|---|---------------------------------------|-----------------------------------------|----------------------------------------|
| Abrocitinib 200 mg daily | Cyclosporine (lower dose)  | 0 | --                                    | -0.2 (-1.1, 0.8); moderate <sup>a</sup> | -0.2 (-1.1, 0.8); low <sup>b</sup>     |
| Abrocitinib 200 mg daily | Dupilumab                  | 1 | -0.1 (-0.4, 0.1); high                | 0 (-0.2, 0.3); high                     | 0 (-0.2, 0.1); high                    |
| Abrocitinib 200 mg daily | Methotrexate               | 0 | --                                    | -0.3 (-1.2, 0.5); moderate <sup>a</sup> | -0.3 (-1.2, 0.5); low <sup>b</sup>     |
| Abrocitinib 200 mg daily | Placebo                    | 4 | -0.9 (-1, -0.7); high                 | --                                      | -0.9 (-1, -0.7); high                  |
| Abrocitinib 200 mg daily | Tralokinumab               | 0 | --                                    | -0.4 (-0.6, -0.2); high                 | -0.4 (-0.6, -0.2); high                |
| Abrocitinib 200 mg daily | Upadacitinib 15 mg daily   | 0 | --                                    | -0.1 (-0.4, 0.1); high                  | -0.1 (-0.4, 0.1); high                 |
| Abrocitinib 200 mg daily | Upadacitinib 30 mg daily   | 0 | --                                    | 0.2 (-0.1, 0.4); high                   | 0.2 (-0.1, 0.4); moderate <sup>b</sup> |
| Azathioprine             | Baricitinib 2 mg daily     | 0 | --                                    | -0.1 (-0.7, 0.5); moderate <sup>a</sup> | -0.1 (-0.7, 0.5); moderate             |
| Azathioprine             | Baricitinib 4 mg daily     | 0 | --                                    | 0 (-0.6, 0.7); moderate <sup>a</sup>    | 0 (-0.6, 0.7); moderate                |
| Azathioprine             | Cyclosporine (higher dose) | 0 | --                                    | 0.1 (-1, 1.1); moderate <sup>a</sup>    | 0.1 (-1, 1.1); low <sup>b</sup>        |
| Azathioprine             | Cyclosporine (lower dose)  | 0 | --                                    | 0.1 (-1.1, 1.2); moderate <sup>a</sup>  | 0.1 (-1.1, 1.2); low <sup>b</sup>      |
| Azathioprine             | Dupilumab                  | 0 | --                                    | 0.2 (-0.4, 0.8); moderate <sup>a</sup>  | 0.2 (-0.4, 0.8); low <sup>b</sup>      |
| Azathioprine             | Methotrexate               | 1 | 0 (-0.7, 0.6); moderate <sup>a</sup>  | --                                      | 0 (-0.7, 0.6); moderate                |
| Azathioprine             | Placebo                    | 1 | -0.6 (-1.2, 0); moderate <sup>a</sup> | --                                      | -0.6 (-1.2, 0); low <sup>b</sup>       |
| Azathioprine             | Tralokinumab               | 0 | --                                    | -0.1 (-0.8, 0.5); moderate <sup>a</sup> | -0.1 (-0.8, 0.5); low <sup>b</sup>     |
| Azathioprine             | Upadacitinib 15 mg daily   | 0 | --                                    | 0.2 (-0.5, 0.8); moderate <sup>a</sup>  | 0.2 (-0.5, 0.8); low <sup>b</sup>      |
| Azathioprine             | Upadacitinib 30 mg daily   | 0 | --                                    | 0.4 (-0.2, 1.1); moderate <sup>a</sup>  | 0.4 (-0.2, 1.1); low <sup>b</sup>      |
| Baricitinib 2 mg daily   | Baricitinib 4 mg daily     | 4 | 0.1 (-0.1, 0.3); high                 | --                                      | 0.1 (-0.1, 0.3); high                  |
| Baricitinib 2 mg daily   | Cyclosporine (higher dose) | 0 | --                                    | 0.2 (-0.7, 1.1); moderate <sup>a</sup>  | 0.2 (-0.7, 1.1); low <sup>b</sup>      |
| Baricitinib 2 mg daily   | Cyclosporine (lower dose)  | 0 | --                                    | 0.2 (-0.8, 1.1); moderate <sup>a</sup>  | 0.2 (-0.8, 1.1); low <sup>b</sup>      |
| Baricitinib 2 mg daily   | Dupilumab                  | 0 | --                                    | 0.3 (0.1, 0.5); high                    | 0.3 (0.1, 0.5); high                   |

|                            |                            |   |                                            |                                            |                                            |
|----------------------------|----------------------------|---|--------------------------------------------|--------------------------------------------|--------------------------------------------|
| Baricitinib 2 mg daily     | Methotrexate               | 0 | --                                         | 0 (-0.8, 0.9);<br>moderate <sup>a</sup>    | 0 (-0.8, 0.9); low <sup>b</sup>            |
| Baricitinib 2 mg daily     | Placebo                    | 5 | -0.5 (-0.7, -0.3); high                    | --                                         | -0.5 (-0.7, -0.3); high                    |
| Baricitinib 2 mg daily     | Tralokinumab               | 0 | --                                         | -0.1 (-0.3, 0.2); high                     | -0.1 (-0.3, 0.2); high                     |
| Baricitinib 2 mg daily     | Upadacitinib 15 mg daily   | 0 | --                                         | 0.2 (0, 0.5); high                         | 0.2 (0, 0.5);<br>moderate <sup>b</sup>     |
| Baricitinib 2 mg daily     | Upadacitinib 30 mg daily   | 0 | --                                         | 0.5 (0.3, 0.8); high                       | 0.5 (0.3, 0.8); high                       |
| Baricitinib 4 mg daily     | Cyclosporine (higher dose) | 0 | --                                         | 0.1 (-0.8, 0.9);<br>moderate <sup>a</sup>  | 0.1 (-0.8, 0.9); low <sup>b</sup>          |
| Baricitinib 4 mg daily     | Cyclosporine (lower dose)  | 0 | --                                         | 0.1 (-0.9, 1);<br>moderate <sup>a</sup>    | 0.1 (-0.9, 1); low <sup>b</sup>            |
| Baricitinib 4 mg daily     | Dupilumab                  | 0 | --                                         | 0.2 (0, 0.4); high                         | 0.2 (0, 0.4);<br>moderate <sup>b</sup>     |
| Baricitinib 4 mg daily     | Methotrexate               | 0 | --                                         | -0.1 (-1, 0.8);<br>moderate <sup>a</sup>   | -0.1 (-1, 0.8); low <sup>b</sup>           |
| Baricitinib 4 mg daily     | Placebo                    | 4 | -0.6 (-0.8, -0.4); high                    | --                                         | -0.6 (-0.8, -0.4); high                    |
| Baricitinib 4 mg daily     | Tralokinumab               | 0 | --                                         | -0.2 (-0.4, 0.1); high                     | -0.2 (-0.4, 0.1);<br>moderate <sup>b</sup> |
| Baricitinib 4 mg daily     | Upadacitinib 15 mg daily   | 0 | --                                         | 0.1 (-0.1, 0.4); high                      | 0.1 (-0.1, 0.4); high                      |
| Baricitinib 4 mg daily     | Upadacitinib 30 mg daily   | 0 | --                                         | 0.4 (0.2, 0.7); high                       | 0.4 (0.2, 0.7); high                       |
| Cyclosporine (higher dose) | Cyclosporine (lower dose)  | 1 | 0 (-0.4, 0.4); moderate <sup>a</sup>       | --                                         | 0 (-0.4, 0.4);<br>moderate                 |
| Cyclosporine (higher dose) | Dupilumab                  | 0 | --                                         | 0.1 (-0.7, 1);<br>moderate <sup>a</sup>    | 0.1 (-0.7, 1); low <sup>b</sup>            |
| Cyclosporine (higher dose) | Methotrexate               | 0 | --                                         | -0.2 (-1.4, 1.1);<br>moderate <sup>a</sup> | -0.2 (-1.4, 1.1); low <sup>b</sup>         |
| Cyclosporine (higher dose) | Placebo                    | 1 | -0.7 (-1.5, 0.2);<br>moderate <sup>a</sup> | --                                         | -0.7 (-1.5, 0.2); low <sup>b</sup>         |
| Cyclosporine (higher dose) | Tralokinumab               | 0 | --                                         | -0.3 (-1.1, 0.6);<br>moderate <sup>a</sup> | -0.3 (-1.1, 0.6); low <sup>b</sup>         |
| Cyclosporine (higher dose) | Upadacitinib 15 mg daily   | 0 | --                                         | 0 (-0.8, 0.9);<br>moderate <sup>a</sup>    | 0 (-0.8, 0.9); low <sup>b</sup>            |
| Cyclosporine (higher dose) | Upadacitinib 30 mg daily   | 0 | --                                         | 0.3 (-0.5, 1.2);<br>moderate <sup>a</sup>  | 0.3 (-0.5, 1.2); low <sup>b</sup>          |
| Cyclosporine (lower dose)  | Dupilumab                  | 0 | --                                         | 0.1 (-0.8, 1.1);<br>moderate <sup>a</sup>  | 0.1 (-0.8, 1.1); low <sup>b</sup>          |



|                           |                          |   |                         |                                         |                                     |
|---------------------------|--------------------------|---|-------------------------|-----------------------------------------|-------------------------------------|
| Cyclosporine (lower dose) | Methotrexate             | 0 | -                       | -0.2 (-1.4, 1.2); moderate <sup>a</sup> | -0.2 (-1.4, 1.2); low <sup>b</sup>  |
| Cyclosporine (lower dose) | Placebo                  | 0 | --                      | -0.7 (-1.6, 0.3); moderate <sup>a</sup> | -0.7 (-1.6, 0.3); low <sup>b</sup>  |
| Cyclosporine (lower dose) | Tralokinumab             | 0 | --                      | -0.2 (-1.2, 0.7); moderate <sup>a</sup> | -0.2 (-1.2, 0.7); low <sup>b</sup>  |
| Cyclosporine (lower dose) | Upadacitinib 15 mg daily | 0 | --                      | 0.1 (-0.9, 1); moderate <sup>a</sup>    | 0.1 (-0.9, 1); low <sup>b</sup>     |
| Cyclosporine (lower dose) | Upadacitinib 30 mg daily | 0 | --                      | 0.3 (-0.6, 1.3); moderate <sup>a</sup>  | 0.3 (-0.6, 1.3); low <sup>b</sup>   |
| Dupilumab                 | Methotrexate             | 0 | --                      | -0.3 (-1.2, 0.6); moderate <sup>a</sup> | -0.3 (-1.2, 0.6); low <sup>b</sup>  |
| Dupilumab                 | Placebo                  | 7 | -0.8 (-0.9, -0.7); high | --                                      | -0.8 (-0.9, -0.7); high             |
| Dupilumab                 | Tralokinumab             | 0 | --                      | -0.4 (-0.6, -0.2); high                 | -0.4 (-0.6, -0.2); high             |
| Dupilumab                 | Upadacitinib 15 mg daily | 0 | --                      | -0.1 (-0.3, 0.1); high                  | -0.1 (-0.3, 0.1); high              |
| Dupilumab                 | Upadacitinib 30 mg daily | 0 | --                      | 0.2 (0, 0.4); high                      | 0.2 (0, 0.4); moderate <sup>b</sup> |
| Methotrexate              | Placebo                  | 0 | --                      | -0.5 (-1.4, 0.3); moderate <sup>a</sup> | -0.5 (-1.4, 0.3); low <sup>b</sup>  |
| Methotrexate              | Tralokinumab             | 0 | --                      | -0.1 (-1, 0.8); moderate <sup>a</sup>   | -0.1 (-1, 0.8); low <sup>b</sup>    |
| Methotrexate              | Upadacitinib 15 mg daily | 0 | --                      | 0.2 (-0.7, 1.1); moderate <sup>a</sup>  | 0.2 (-0.7, 1.1); low <sup>b</sup>   |
| Methotrexate              | Upadacitinib 30 mg daily | 0 | --                      | 0.5 (-0.4, 1.4); moderate <sup>a</sup>  | 0.5 (-0.4, 1.4); low <sup>b</sup>   |
| Tralokinumab              | Placebo                  | 3 | --                      | --                                      | -0.4 (-0.6, -0.3); high             |
| Tralokinumab              | Upadacitinib 15 mg daily | 0 | --                      | 0.3 (0.1, 0.5); high                    | 0.3 (0.1, 0.5); high                |
| Tralokinumab              | Upadacitinib 30 mg daily | 0 | --                      | 0.6 (0.4, 0.8); high                    | 0.6 (0.4, 0.8); high                |
| Upadacitinib 15 mg daily  | Upadacitinib 30 mg daily | 4 | 0.3 (0.1, 0.4); high    | --                                      | 0.3 (0.1, 0.4); high                |
| Upadacitinib 15 mg daily  | Placebo                  | 4 | 0.7 (0.6, 0.9); high    | --                                      | 0.7 (0.6, 0.9); high                |
| Upadacitinib 30 mg daily  | Placebo                  | 4 | 1 (0.9, 1.2); high      | --                                      | 1 (0.9, 1.2) high                   |

Dose of dupilumab and tralokinumab is 600 mg then 300 mg every 2 weeks

The network meta-analysis certainty ratings start at the higher of the direct or indirect ratings and can then be rated down further for incoherence (based on the results of node splitting analyses) and imprecision.

- a. Rated down for significant issues related to risk of bias in included trials
- b. Rated down for imprecision

**eFigure 4.** Network graphs of studies included in the analysis of adults treated between 8 and 16 weeks for withdrawal due to adverse events. The width of each line connecting two treatments (nodes) is proportional to the number of head-to-head trials for that comparison.

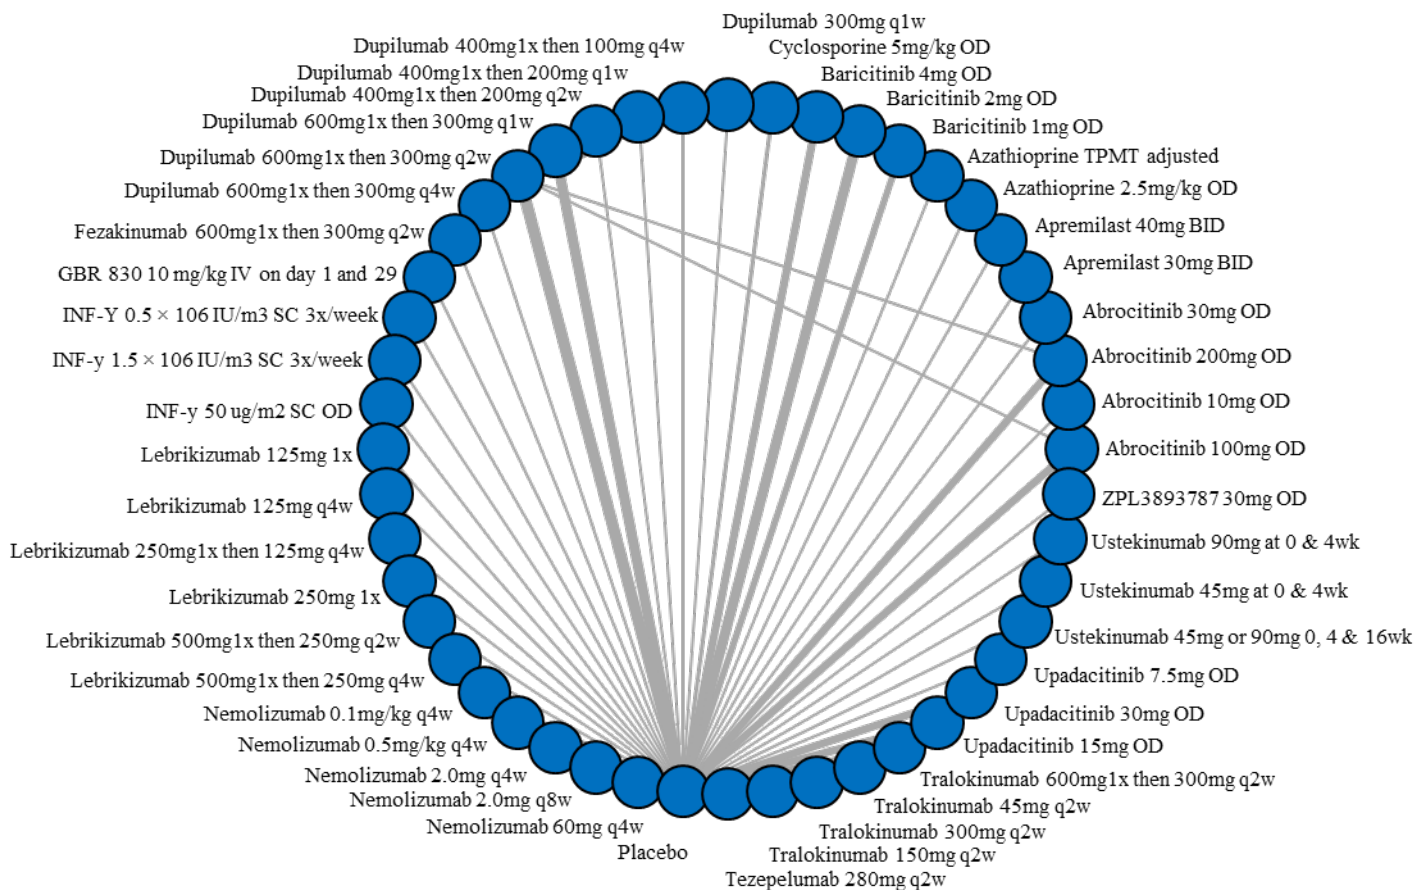

OD: once daily; q1w: once weekly; q2w: every 2 weeks; q4w: every 4 weeks.

**eTable 16.** League table with relative effect estimates for withdrawals from adverse events up to 16 weeks of treatment in adults for placebo and medications used in clinical practice or likely to be approved soon. Results for other pairwise comparisons in the network can be requested from the authors. Results are presented as Odds Ratios (95% CrI). Odds ratios are given as the odds with the column-defining treatment over the odds with the row-defining treatment. Odds ratios over 1 indicate more withdrawals due to serious adverse event with the intervention vs. comparator.

|                                                   | Abrocitinib<br>100 mg daily | Abrocitinib<br>200 mg daily | Baricitinib 2<br>mg daily | Baricitinib 4<br>mg daily | Dupilumab<br>600 mg then<br>300 mg q2<br>weeks | Placebo           | Tralokinumab<br>600 mg then<br>300 mg q2<br>weeks | Upadacitinib<br>15 mg daily | Upadacitinib<br>30 mg daily |
|---------------------------------------------------|-----------------------------|-----------------------------|---------------------------|---------------------------|------------------------------------------------|-------------------|---------------------------------------------------|-----------------------------|-----------------------------|
| Abrocitinib<br>100 mg daily                       |                             | 1 (0.5, 1.7)                | 1.1 (0.4, 3)              | 2.1 (0.8, 5.5)            | 1.3 (0.6, 2.8)                                 | 1.3 (0.8,<br>2.4) | 1.2 (0.5, 2.9)                                    | 0.8 (0.3, 1.8)              | 1 (0.4, 2.2)                |
| Abrocitinib<br>200 mg daily                       | 1.1 (0.6, 1.8)              |                             | 1.2 (0.4, 3.1)            | 2.2 (0.8, 5.9)            | 1.3 (0.6, 2.9)                                 | 1.4 (0.8,<br>2.5) | 1.3 (0.5, 3.1)                                    | 0.8 (0.3, 1.9)              | 1 (0.5, 2.3)                |
| Baricitinib<br>2 mg daily                         | 0.9 (0.3, 2.5)              | 0.9 (0.3, 2.4)              |                           | 1.9 (0.8, 4.8)            | 1.2 (0.4, 3.4)                                 | 1.2 (0.5,<br>2.9) | 1.1 (0.4, 3.2)                                    | 0.7 (0.3, 2)                | 0.9 (0.3, 2.5)              |
| Baricitinib<br>4 mg daily                         | 0.5 (0.2, 1.3)              | 0.5 (0.2, 1.3)              | 0.5 (0.2, 1.3)            |                           | 0.6 (0.2, 1.7)                                 | 0.7 (0.3,<br>1.5) | 0.6 (0.2, 1.6)                                    | 0.4 (0.1, 1)                | 0.5 (0.2, 1.3)              |
| Dupilumab<br>600 mg then<br>300 mg q2<br>weeks    | 0.8 (0.4, 1.7)              | 0.7 (0.3, 1.6)              | 0.9 (0.3, 2.4)            | 1.6 (0.6, 4.5)            |                                                | 1 (0.6, 2)        | 0.9 (0.4, 2.4)                                    | 0.6 (0.3, 1.4)              | 0.8 (0.3, 1.8)              |
| Placebo                                           | 0.7 (0.4, 1.3)              | 0.7 (0.4, 1.3)              | 0.8 (0.3, 1.9)            | 1.5 (0.7, 3.4)            | 1 (0.5, 1.8)                                   |                   | 0.9 (0.5, 1.8)                                    | 0.6 (0.3, 1)                | 0.7 (0.4, 1.3)              |
| Tralokinumab<br>600 mg then<br>300 mg q2<br>weeks | 0.8 (0.3, 2)                | 0.8 (0.3, 1.9)              | 0.9 (0.3, 2.6)            | 1.7 (0.6, 4.7)            | 1.1 (0.4, 2.6)                                 | 1.1 (0.6,<br>2.1) |                                                   | 0.6 (0.3, 1.5)              | 0.8 (0.3, 1.9)              |
| Upadacitinib<br>15 mg daily                       | 1.3 (0.6, 3)                | 1.2 (0.5, 2.9)              | 1.4 (0.5, 3.9)            | 2.7 (1, 7.4)              | 1.7 (0.7, 4)                                   | 1.7 (1, 3.2)      | 1.6 (0.7, 3.9)                                    |                             | 1.3 (0.7, 2.4)              |
| Upadacitinib<br>30 mg daily                       | 1 (0.5, 2.3)                | 1 (0.4, 2.2)                | 1.1 (0.4, 3.1)            | 2.1 (0.8, 5.7)            | 1.3 (0.6, 3.1)                                 | 1.4 (0.8,<br>2.5) | 1.2 (0.5, 3)                                      | 0.8 (0.4, 1.5)              |                             |
| SUCRA                                             | 0.69                        | 0.71                        | 0.66                      | 0.45                      | 0.60                                           | 0.58              | 0.62                                              | 0.77                        | 0.70                        |

**eTable 17.** GRADE certainty ratings for withdrawals from adverse events up to 16 weeks of treatment in adults for placebo and medications used in clinical practice or likely to be approved soon. Results are presented as Odds Ratios (95% CrI). Odds ratios are given as the odds with the treatment in the intervention column over the odds of the treatment in the comparator column. Odds ratios over 1 indicate more withdrawals due to serious adverse event with the intervention vs. comparator.

| Intervention             | Comparator               | Head-to-head trials, n | Direct estimate (95% CrI); Certainty of Evidence | Indirect estimate (95% CrI); Certainty of Evidence | NMA Estimate (95% CrI); Certainty of Evidence |
|--------------------------|--------------------------|------------------------|--------------------------------------------------|----------------------------------------------------|-----------------------------------------------|
| Abrocitinib 100 mg daily | Abrocitinib 200 mg daily | 4                      | 1.1 (0.6, 1.8); moderate*                        | --                                                 | 1.1 (0.6, 1.8); low <sup>a</sup>              |
| Abrocitinib 100 mg daily | Baricitinib 2 mg daily   | 0                      | --                                               | 0.9 (0.3, 2.5); moderate*                          | 0.9 (0.3, 2.5); very low <sup>b</sup>         |
| Abrocitinib 100 mg daily | Baricitinib 4 mg daily   | 0                      | --                                               | 0.5 (0.2, 1.3); moderate*                          | 0.5 (0.2, 1.3); very low <sup>b</sup>         |
| Abrocitinib 100 mg daily | Dupilumab                | 1                      | 0.8 (0.2, 3.6); high                             | 0.6 (0.2, 1.8); moderate*                          | 0.8 (0.4, 1.7); low <sup>a</sup>              |
| Abrocitinib 100 mg daily | Placebo                  | 4                      | 0.7 (0.4, 1.3); moderate*                        | --                                                 | 0.7 (0.4, 1.3); low <sup>a</sup>              |
| Abrocitinib 100 mg daily | Tralokinumab             | 0                      | --                                               | 0.8 (0.3, 2); moderate*                            | 0.8 (0.3, 2); very low <sup>b</sup>           |
| Abrocitinib 100 mg daily | Upadacitinib 15 mg daily | 0                      | --                                               | 1.3 (0.6, 3); moderate*                            | 1.3 (0.6, 3); very low <sup>b</sup>           |
| Abrocitinib 100 mg daily | Upadacitinib 30 mg daily | 0                      | --                                               | 1 (0.5, 2.3); moderate*                            | 1 (0.5, 2.3); very low <sup>b</sup>           |
| Abrocitinib 200 mg daily | Baricitinib 2 mg daily   | 0                      | --                                               | 0.9 (0.3, 2.4); moderate*                          | 0.9 (0.3, 2.4); very low <sup>b</sup>         |
| Abrocitinib 200 mg daily | Baricitinib 4 mg daily   | 0                      | --                                               | 0.5 (0.2, 1.3); moderate*                          | 0.5 (0.2, 1.3); very low <sup>b</sup>         |
| Abrocitinib 200 mg daily | Dupilumab                | 1                      | 1.5 (0.4, 5.9); high                             | 0.4 (0.1, 1.4); moderate*                          | 0.8 (0.3, 1.6); very low <sup>b</sup>         |
| Abrocitinib 200 mg daily | Placebo                  | 4                      | 0.7 (0.4, 1.3); moderate*                        | --                                                 | 0.7 (0.4, 1.3); low <sup>a</sup>              |
| Abrocitinib 200 mg daily | Tralokinumab             | 0                      | --                                               | 0.8 (0.3, 1.9); moderate*                          | 0.8 (0.3, 1.9); very low <sup>b</sup>         |

|                          |                          |   |                           |                           |                                       |
|--------------------------|--------------------------|---|---------------------------|---------------------------|---------------------------------------|
| Abrocitinib 200 mg daily | Upadacitinib 15 mg daily | 0 | --                        | 1.2 (0.5, 2.9); moderate* | 1.2 (0.5, 2.9); very low <sup>b</sup> |
| Abrocitinib 200 mg daily | Upadacitinib 30 mg daily | 0 | --                        | 1 (0.4, 2.2); moderate*   | 1 (0.4, 2.2); very low <sup>b</sup>   |
| Baricitinib 2 mg daily   | Baricitinib 4 mg daily   | 4 | 0.5 (0.2, 1.3); moderate* | --                        | 0.5 (0.2, 1.3); low <sup>a</sup>      |
| Baricitinib 2 mg daily   | Dupilumab                | 0 | --                        | 0.9 (0.3, 2.4); moderate* | 0.9 (0.3, 2.4); very low <sup>b</sup> |
| Baricitinib 2 mg daily   | Placebo                  | 5 | 0.8 (0.3, 1.9); moderate* | --                        | 0.8 (0.3, 1.9); very low <sup>b</sup> |
| Baricitinib 2 mg daily   | Tralokinumab             | 0 | --                        | 0.9 (0.3, 2.6); moderate* | 0.9 (0.3, 2.6); very low <sup>b</sup> |
| Baricitinib 2 mg daily   | Upadacitinib 15 mg daily | 0 | --                        | 1.4 (0.5, 3.9); moderate* | 1.4 (0.5, 3.9); very low <sup>b</sup> |
| Baricitinib 2 mg daily   | Upadacitinib 30 mg daily | 0 | --                        | 1.1 (0.4, 3.1); moderate* | 1.1 (0.4, 3.1); very low <sup>b</sup> |
| Baricitinib 4 mg daily   | Dupilumab                | 0 | --                        | 1.6 (0.6, 4.5); moderate* | 1.6 (0.6, 4.5); very low <sup>b</sup> |
| Baricitinib 4 mg daily   | Placebo                  | 4 | 1.5 (0.7, 3.4); moderate* | --                        | 1.5 (0.7, 3.4); very low <sup>b</sup> |
| Baricitinib 4 mg daily   | Tralokinumab             | 0 | --                        | 1.7 (0.6, 4.7); moderate* | 1.7 (0.6, 4.7); very low <sup>b</sup> |
| Baricitinib 4 mg daily   | Upadacitinib 15 mg daily | 0 | --                        | 2.7 (1, 7.4); moderate*   | 2.7 (1, 7.4); very low <sup>b</sup>   |
| Baricitinib 4 mg daily   | Upadacitinib 30 mg daily | 0 | --                        | 2.1 (0.8, 5.7); moderate* | 2.1 (0.8, 5.7); very low <sup>b</sup> |
| Dupilumab                | Placebo                  | 6 | 1 (0.5, 1.8); moderate*   | --                        | 1 (0.5, 1.8); low <sup>a</sup>        |
| Dupilumab                | Tralokinumab             | 0 | --                        | 1.1 (0.4, 2.6); moderate* | 1.1 (0.4, 2.6); very low <sup>b</sup> |
| Dupilumab                | Upadacitinib 15 mg daily | 0 | --                        | 1.7 (0.7, 4); moderate*   | 1.7 (0.7, 4); very low <sup>b</sup>   |
| Dupilumab                | Upadacitinib 30 mg daily | 0 | --                        | 1.3 (0.6, 3.1); moderate* | 1.3 (0.6, 3.1); very low <sup>b</sup> |
| Tralokinumab             | Upadacitinib 15 mg daily | 0 | --                        | 1.6 (0.7, 3.9); moderate* | 1.6 (0.7, 3.9); very low <sup>b</sup> |

|                          |                          |   |                           |                         |                                     |
|--------------------------|--------------------------|---|---------------------------|-------------------------|-------------------------------------|
| Tralokinumab             | Upadacitinib 30 mg daily | 0 | --                        | 1.2 (0.5, 3); moderate* | 1.2 (0.5, 3); very low <sup>b</sup> |
| Tralokinumab             | Placebo                  | 4 | 0.9 (0.5, 1.8); moderate* | --                      | 0.9 (0.5, 1.8); low <sup>a</sup>    |
| Upadacitinib 15 mg daily | Upadacitinib 30 mg daily | 4 | 0.8 (0.4, 1.5); moderate* | --                      | 0.8 (0.4, 1.5); low <sup>a</sup>    |
| Upadacitinib 15 mg daily | Placebo                  | 4 | 0.6 (0.3, 1); high        | --                      | 0.6 (0.3, 1); moderate <sup>a</sup> |
| Upadacitinib 30 mg daily | Placebo                  | 4 | 0.7 (0.4, 1.3); moderate* | --                      | 0.7 (0.4, 1.3); low <sup>a</sup>    |

Dose of dupilumab and tralokinumab is 600 mg then 300 mg every 2 weeks

The network meta-analysis certainty ratings start at the higher of the direct or indirect ratings and can then be rated down further for incoherence (based on the results of node splitting analyses) and imprecision.

\* Rated down for inconsistency

a. Rated down for imprecision (estimate imprecise and would suggest different conclusions at either end of the 95% Credible Intervals)

b. Rated down 2 levels for imprecision (estimate imprecise and would suggest different conclusions at either end of the 95% Credible Intervals and very wide credible intervals)

**eFigure 5.** Network graphs of studies included in the analysis of adults treated between 8 and 16 weeks for serious adverse events. The width of each line connecting two treatments (nodes) is proportional to the number of head-to-head trials for that comparison.

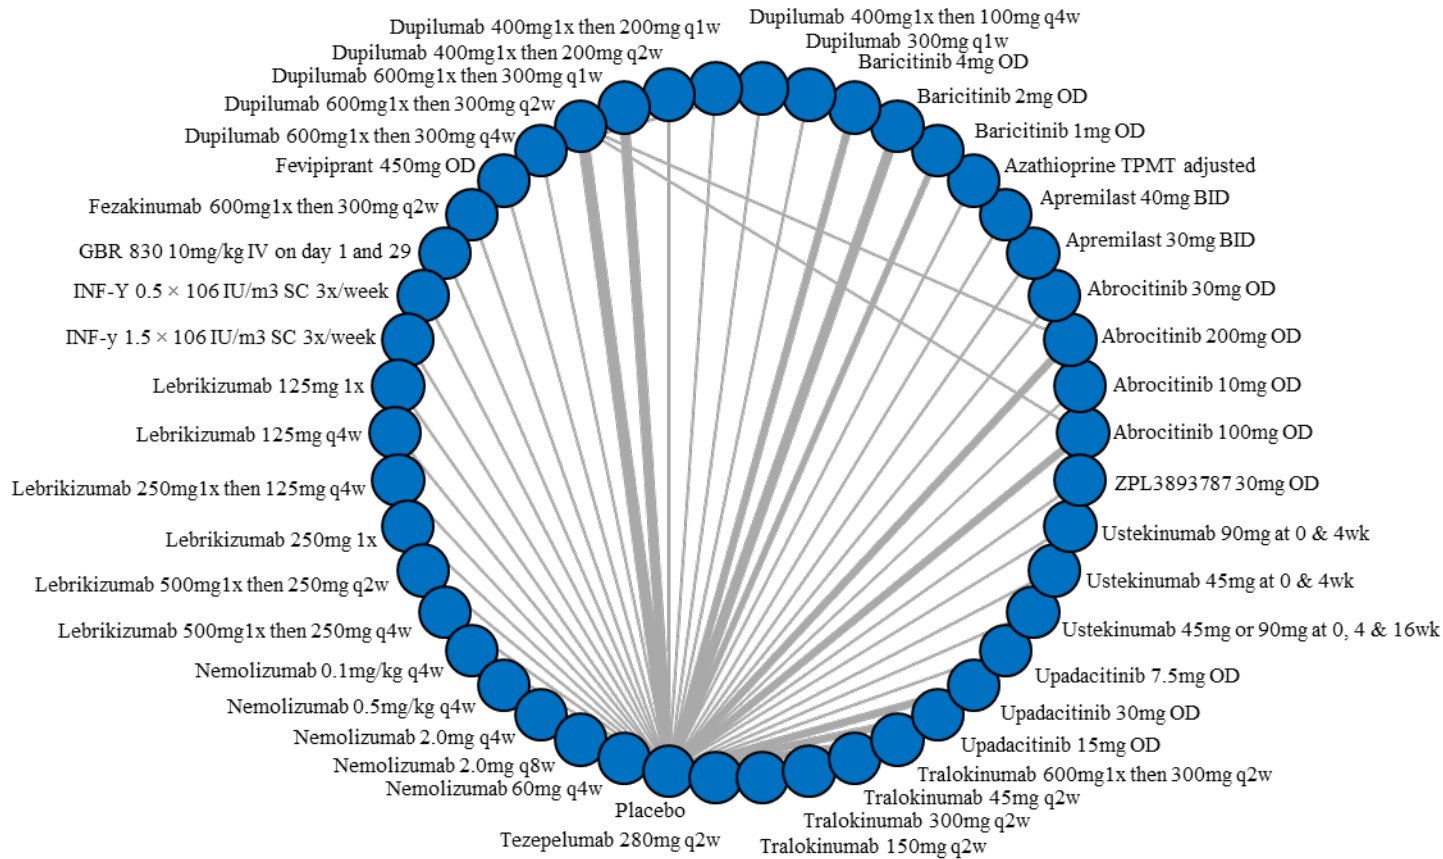

OD: once daily; q1w: once weekly; q2w: every 2 weeks; q4w: every 4 weeks.



**eTable 18.** League table with relative effect estimates for serious adverse events up to 16 weeks of treatment in adults for placebo and medications used in clinical practice or likely to be approved soon. Results for other pairwise comparisons in the network can be requested from the authors. Results are presented as Odds Ratios (95% CrI). Odds ratios are given as the odds with the column-defining treatment over the odds with the row-defining treatment. Odds ratios over 1 indicate more adverse serious adverse event with the intervention vs. comparator.

|                                                   | Abrocitinib<br>100 mg daily | Abrocitinib<br>200 mg daily | Baricitinib 2<br>mg daily | Baricitinib 4<br>mg daily | Dupilumab<br>600 mg then<br>300 mg q2<br>weeks | Placebo           | Tralokinumab<br>600 mg then<br>300 mg q2<br>weeks | Upadacitinib<br>15 mg daily | Upadacitinib<br>30 mg daily |
|---------------------------------------------------|-----------------------------|-----------------------------|---------------------------|---------------------------|------------------------------------------------|-------------------|---------------------------------------------------|-----------------------------|-----------------------------|
| Abrocitinib<br>100 mg daily                       |                             | 0.5 (0.2, 1.1)              | 0.4 (0.1, 1.1)            | 0.6 (0.2, 1.7)            | 0.4 (0.2, 0.9)                                 | 0.8 (0.4,<br>1.7) | 0.6 (0.2, 1.5)                                    | 0.6 (0.2, 1.5)              | 0.6 (0.2, 1.5)              |
| Abrocitinib<br>200 mg daily                       | 1.9 (0.9, 4.2)              |                             | 0.7 (0.2, 2.2)            | 1.1 (0.3, 3.4)            | 0.7 (0.3, 1.9)                                 | 1.5 (0.7,<br>3.7) | 1.1 (0.4, 3.1)                                    | 1.1 (0.4, 3)                | 1 (0.4, 3)                  |
| Baricitinib<br>2 mg daily                         | 2.7 (0.9, 8.3)              | 1.4 (0.5, 4.6)              |                           | 1.6 (0.6, 4)              | 1 (0.4, 2.8)                                   | 2.2 (1, 5)        | 1.5 (0.6, 4.3)                                    | 1.5 (0.6, 4.2)              | 1.5 (0.5, 4.1)              |
| Baricitinib<br>4 mg daily                         | 1.7 (0.6, 5.1)              | 0.9 (0.3, 2.9)              | 0.6 (0.3, 1.6)            |                           | 0.7 (0.3, 1.7)                                 | 1.4 (0.7,<br>3.1) | 1 (0.4, 2.6)                                      | 1 (0.4, 2.6)                | 0.9 (0.4, 2.5)              |
| Dupilumab<br>600 mg then<br>300 mg q2<br>weeks    | 2.6 (1.1, 6.4)              | 1.4 (0.5, 3.6)              | 1 (0.4, 2.5)              | 1.5 (0.6, 3.9)            |                                                | 2.1 (1.2,<br>3.9) | 1.5 (0.6, 3.5)                                    | 1.4 (0.6, 3.4)              | 1.4 (0.6, 3.4)              |
| Placebo                                           | 1.2 (0.6, 2.6)              | 0.6 (0.3, 1.5)              | 0.5 (0.2, 1)              | 0.7 (0.3, 1.4)            | 0.5 (0.3, 0.8)                                 |                   | 0.7 (0.4, 1.3)                                    | 0.7 (0.4, 1.3)              | 0.7 (0.3, 1.2)              |
| Tralokinumab<br>600 mg then<br>300 mg q2<br>weeks | 1.7 (0.7, 4.7)              | 0.9 (0.3, 2.7)              | 0.7 (0.2, 1.7)            | 1 (0.4, 2.6)              | 0.7 (0.3, 1.6)                                 | 1.4 (0.8,<br>2.7) |                                                   | 1 (0.4, 2.3)                | 1 (0.4, 2.3)                |
| Upadacitinib<br>15 mg daily                       | 1.8 (0.7, 4.8)              | 0.9 (0.3, 2.7)              | 0.7 (0.2, 1.8)            | 1 (0.4, 2.7)              | 0.7 (0.3, 1.6)                                 | 1.5 (0.8,<br>2.8) | 1 (0.4, 2.5)                                      |                             | 1 (0.5, 2)                  |
| Upadacitinib<br>30 mg daily                       | 1.8 (0.7, 5)                | 1 (0.3, 2.8)                | 0.7 (0.2, 1.8)            | 1.1 (0.4, 2.8)            | 0.7 (0.3, 1.7)                                 | 1.5 (0.8,<br>2.9) | 1 (0.4, 2.6)                                      | 1 (0.5, 2)                  |                             |
| SUCRA                                             | 0.37                        | 0.56                        | 0.67                      | 0.54                      | 0.66                                           | 0.42              | 0.54                                              | 0.55                        | 0.56                        |

**eTable 19.** GRADE certainty ratings for serious adverse events up to 16 weeks of treatment in adults for placebo and medications used in clinical practice or likely to be approved soon. Results are presented as Odds Ratios (95% CrI). Odds ratios are given as the odds with the treatment in the intervention column over the odds of the treatment in the comparator column. Odds ratios over 1 indicate more adverse serious adverse event with the intervention vs. comparator.

| Intervention             | Comparator               | Head-to-head trials, n | Direct estimate (95% CrI); Certainty of Evidence | Indirect estimate (95% CrI); Certainty of Evidence | NMA Estimate (95% CrI); Certainty of Evidence |
|--------------------------|--------------------------|------------------------|--------------------------------------------------|----------------------------------------------------|-----------------------------------------------|
| Abrocitinib 100 mg daily | Abrocitinib 200 mg daily | 4                      | 1.9 (0.9, 4.2); moderate*                        | --                                                 | 1.9 (0.9, 4.2); very low <sup>c</sup>         |
| Abrocitinib 100 mg daily | Baricitinib 2 mg daily   | 0                      | --                                               | 2.7 (0.9, 8.3); moderate*                          | 2.7 (0.9, 8.3); very low <sup>c</sup>         |
| Abrocitinib 100 mg daily | Baricitinib 4 mg daily   | 0                      | --                                               | 1.7 (0.6, 5.1); moderate*                          | 1.7 (0.6, 5.1); very low <sup>c</sup>         |
| Abrocitinib 100 mg daily | Dupilumab                | 1                      | 3.4 (0.6, 27.8); high                            | 2.2 (0.7, 7.7); moderate*                          | 2.6 (1.1, 6.4); low <sup>b</sup>              |
| Abrocitinib 100 mg daily | Placebo                  | 4                      | 1.2 (0.6, 2.6); moderate*                        | --                                                 | 1.2 (0.6, 2.6); very low <sup>c</sup>         |
| Abrocitinib 100 mg daily | Tralokinumab             | 0                      | --                                               | 1.7 (0.7, 4.7); moderate*                          | 1.7 (0.7, 4.7); very low <sup>c</sup>         |
| Abrocitinib 100 mg daily | Upadacitinib 15 mg daily | 0                      | --                                               | 1.8 (0.7, 4.8); moderate*                          | 1.8 (0.7, 4.8); very low <sup>c</sup>         |
| Abrocitinib 100 mg daily | Upadacitinib 30 mg daily | 0                      | --                                               | 1.8 (0.7, 5); moderate*                            | 1.8 (0.7, 5); very low <sup>c</sup>           |
| Abrocitinib 200 mg daily | Baricitinib 2 mg daily   | 0                      | --                                               | 1.4 (0.5, 4.6); moderate*                          | 1.4 (0.5, 4.6); very low <sup>c</sup>         |
| Abrocitinib 200 mg daily | Baricitinib 4 mg daily   | 0                      | --                                               | 0.9 (0.3, 2.9); moderate*                          | 0.9 (0.3, 2.9); very low <sup>c</sup>         |
| Abrocitinib 200 mg daily | Dupilumab                | 1                      | 1.1 (0.1, 12.2); high                            | 1.6 (0.5, 5.6); moderate*                          | 1.4 (0.5, 3.6); very low <sup>c</sup>         |
| Abrocitinib 200 mg daily | Placebo                  | 4                      | 0.6 (0.3, 1.5); moderate*                        | --                                                 | 0.6 (0.3, 1.5); very low <sup>c</sup>         |
| Abrocitinib 200 mg daily | Tralokinumab             | 0                      | --                                               | 0.9 (0.3, 2.7); moderate*                          | 0.9 (0.3, 2.7); very low <sup>c</sup>         |

|                          |                          |   |                           |                           |                                       |
|--------------------------|--------------------------|---|---------------------------|---------------------------|---------------------------------------|
| Abrocitinib 200 mg daily | Upadacitinib 15 mg daily | 0 | --                        | 0.9 (0.3, 2.7); moderate* | 0.9 (0.3, 2.7); very low <sup>c</sup> |
| Abrocitinib 200 mg daily | Upadacitinib 30 mg daily | 0 | --                        | 1 (0.3, 2.8); moderate*   | 1 (0.3, 2.8); very low <sup>c</sup>   |
| Baricitinib 2 mg daily   | Baricitinib 4 mg daily   | 4 | 0.6 (0.3, 1.6); moderate* | --                        | 0.6 (0.3, 1.6); low <sup>a</sup>      |
| Baricitinib 2 mg daily   | Dupilumab                | 0 | --                        | 1 (0.4, 2.5); moderate*   | 1 (0.4, 2.5); very low <sup>c</sup>   |
| Baricitinib 2 mg daily   | Placebo                  | 5 | 0.5 (0.2, 1); high        | --                        | 0.5 (0.2, 1); low <sup>a</sup>        |
| Baricitinib 2 mg daily   | Tralokinumab             | 0 | --                        | 0.7 (0.2, 1.7); moderate* | 0.7 (0.2, 1.7); very low <sup>c</sup> |
| Baricitinib 2 mg daily   | Upadacitinib 15 mg daily | 0 | --                        | 0.7 (0.2, 1.8); high      | 0.7 (0.2, 1.8); low <sup>c</sup>      |
| Baricitinib 2 mg daily   | Upadacitinib 30 mg daily | 0 | --                        | 0.7 (0.2, 1.8); high      | 0.7 (0.2, 1.8); low <sup>c</sup>      |
| Baricitinib 4 mg daily   | Dupilumab                | 0 | --                        | 1.5 (0.6, 3.9); moderate* | 1.5 (0.6, 3.9); very low <sup>c</sup> |
| Baricitinib 4 mg daily   | Placebo                  | 4 | 0.7 (0.3, 1.4); moderate* | --                        | 0.7 (0.3, 1.4); low <sup>a</sup>      |
| Baricitinib 4 mg daily   | Tralokinumab             | 0 | --                        | 1 (0.4, 2.6); moderate*   | 1 (0.4, 2.6); very low <sup>c</sup>   |
| Baricitinib 4 mg daily   | Upadacitinib 15 mg daily | 0 | --                        | 1 (0.4, 2.7); moderate*   | 1 (0.4, 2.7); very low <sup>c</sup>   |
| Baricitinib 4 mg daily   | Upadacitinib 30 mg daily | 0 | --                        | 1.1 (0.4, 2.8); moderate* | 1.1 (0.4, 2.8); very low <sup>c</sup> |
| Dupilumab                | Placebo                  | 6 | 0.5 (0.3, 0.8); moderate* | --                        | 0.5 (0.3, 0.8); moderate              |
| Dupilumab                | Tralokinumab             | 0 | --                        | 0.7 (0.3, 1.6); moderate* | 0.7 (0.3, 1.6); very low <sup>c</sup> |
| Dupilumab                | Upadacitinib 15 mg daily | 0 | --                        | 0.7 (0.3, 1.6); moderate* | 0.7 (0.3, 1.6); very low <sup>c</sup> |
| Dupilumab                | Upadacitinib 30 mg daily | 0 | --                        | 0.7 (0.3, 1.7); moderate* | 0.7 (0.3, 1.7); very low <sup>c</sup> |
| Tralokinumab             | Upadacitinib 15 mg daily | 0 | --                        | 1 (0.4, 2.5); moderate*   | 1 (0.4, 2.5); very low <sup>c</sup>   |
| Tralokinumab             | Upadacitinib 30 mg daily | 0 | --                        | 1 (0.4, 2.6); moderate*   | 1 (0.4, 2.6); very low <sup>c</sup>   |

|                          |                          |   |                           |    |                                       |
|--------------------------|--------------------------|---|---------------------------|----|---------------------------------------|
| Tralokinumab             | Placebo                  | 4 | 0.7 (0.4, 1.3); moderate* | -- | 0.7 (0.4, 1.3); low <sup>a</sup>      |
| Upadacitinib 15 mg daily | Upadacitinib 30 mg daily | 4 | 1 (0.5, 2); moderate*     | -- | 1 (0.5, 2); very low <sup>c</sup>     |
| Upadacitinib 15 mg daily | Placebo                  | 4 | 0.7 (0.4, 1.3); high      | -- | 0.7 (0.4, 1.3); moderate <sup>a</sup> |
| Upadacitinib 30 mg daily | Placebo                  | 4 | 0.7 (0.3, 1.2); high      | -- | 0.7 (0.3, 1.2); moderate <sup>a</sup> |

Dose of dupilumab and tralokinumab is 600 mg then 300 mg every 2 weeks

The network meta-analysis certainty ratings start at the higher of the direct or indirect ratings and can then be rated down further for incoherence (based on the results of node splitting analyses) and imprecision.

\* Rated down for inconsistency

a. Rated down for imprecision (estimate imprecise and would suggest different conclusions at either end of the 95% Credible Intervals)

b. Rated down for imprecision (very wide credible intervals)

c. Rated down 2 levels for imprecision (estimate imprecise and would suggest different conclusions at either end of the 95% Credible Intervals and very wide credible intervals)

### Supplement references

1. Chan S, Cornelius V, Cro S, Harper JI, Lack G. Treatment Effect of Omalizumab on Severe Pediatric Atopic Dermatitis: The ADAPT Randomized Clinical Trial. *JAMA Pediatr.* 2019.
2. Simpson EL, Lacour JP, Spelman L, et al. Baricitinib in patients with moderate-to-severe atopic dermatitis and inadequate response to topical corticosteroids: results from two randomized monotherapy phase III trials. *The British journal of dermatology.* 2020;183(2):242-255.
3. Simpson EL, Sinclair R, Forman S, et al. Efficacy and safety of abrocitinib in adults and adolescents with moderate-to-severe atopic dermatitis (JADE MONO-1): a multicentre, double-blind, randomised, placebo-controlled, phase 3 trial. *Lancet.* 2020;396(10246):255-266.
4. Guttman-Yassky E, Blauvelt A, Eichenfield LF, et al. Efficacy and Safety of Lebrikizumab, a High-Affinity Interleukin 13 Inhibitor, in Adults With Moderate to Severe Atopic Dermatitis: A Phase 2b Randomized Clinical Trial. *JAMA dermatology.* 2020;156(4):411-420.
5. Paller AS, Siegfried EC, Thaci D, et al. Efficacy and safety of dupilumab with concomitant topical corticosteroids in children 6 to 11 years old with severe atopic dermatitis: A randomized, double-blinded, placebo-controlled phase 3 trial. *Journal of the American Academy of Dermatology.* 2020;83(5):1282-1293.
6. Reich K, Kabashima K, Peris K, et al. Efficacy and Safety of Baricitinib Combined With Topical Corticosteroids for Treatment of Moderate to Severe Atopic Dermatitis: A Randomized Clinical Trial. *JAMA dermatology.* 2020;156(12):1333-1343.
7. Silverberg JI, Toth D, Bieber T, et al. Tralokinumab plus topical corticosteroids for the treatment of moderate-to-severe atopic dermatitis: results from the double-blind, randomized, multicentre, placebo-controlled phase III ECZTRA 3 trial. *The British journal of dermatology.* 2021;184(3):450-463.
8. Wollenberg A, Blauvelt A, Guttman-Yassky E, et al. Tralokinumab for moderate-to-severe atopic dermatitis: results from two 52-week, randomized, double-blind, multicentre, placebo-controlled phase III trials (ECZTRA 1 and ECZTRA 2). *The British journal of dermatology.* 2021;184(3):437-449.
9. Kabashima K, Matsumura T, Komazaki H, Kawashima M, Nemolizumab JPSG. Trial of Nemolizumab and Topical Agents for Atopic Dermatitis with Pruritus. *The New England journal of medicine.* 2020;383(2):141-150.
10. Silverberg JI, Simpson EL, Thyssen JP, et al. Efficacy and Safety of Abrocitinib in Patients With Moderate-to-Severe Atopic Dermatitis: A Randomized Clinical Trial. *JAMA dermatology.* 2020;156(8):863-873.
11. Simpson EL, Forman S, Silverberg JI, et al. Baricitinib in patients with moderate-to-severe atopic dermatitis: Results from a randomized monotherapy Phase 3 trial in the United States and Canada (BREEZE-AD5). *Journal of the American Academy of Dermatology.* 2021.
12. Company ELA. A Long-term Study of Baricitinib (LY3009104) With Topical Corticosteroids in Adults With Moderate to Severe Atopic Dermatitis That Are Not Controlled With Cyclosporine or for Those Who Cannot Take Oral Cyclosporine Because it is Not Medically Advisable (BREEZE-AD4). <https://clinicaltrials.gov/ct2/show/NCT03428100>. Accessed March 1 2021.
13. Pfizer. Study Evaluating Efficacy and Safety of PF-04965842 and Dupilumab in Adult Subjects With Moderate to Severe Atopic Dermatitis on Background Topical Therapy (JADE Compare). <https://clinicaltrials.gov/ct2/show/NCT03720470>. Accessed March 1, 2021.
14. Sanofi. Evaluation of Dupilumab in Chinese Adult Patients With Moderate to Severe Atopic Dermatitis. <https://clinicaltrials.gov/ct2/show/NCT03912259>. Accessed June 23, 2021.
15. Pfizer. JAK1 Inhibitor With Medicated Topical Therapy in Adolescents With Atopic Dermatitis (JADE TEEN). <https://clinicaltrials.gov/ct2/show/NCT03796676>. Accessed June 25, 2021.
16. Guttman-Yassky E, Teixeira HD, Simpson EL, et al. Once-daily upadacitinib versus placebo in adolescents and adults with moderate-to-severe atopic dermatitis (Measure Up 1 and Measure Up

- 2): results from two replicate double-blind, randomised controlled phase 3 trials. *Lancet*. 2021;397(10290):2151-2168.
17. Reich K, Teixeira HD, de Bruin-Weller M, et al. Safety and efficacy of upadacitinib in combination with topical corticosteroids in adolescents and adults with moderate-to-severe atopic dermatitis (AD Up): results from a randomised, double-blind, placebo-controlled, phase 3 trial. *Lancet*. 2021;397(10290):2169-2181.
  18. Merola JF, Bagel J, Almgren P, et al. Tralokinumab does not impact vaccine-induced immune responses: Results from a 30-week, randomized, placebo-controlled trial in adults with moderate-to-severe atopic dermatitis. *Journal of the American Academy of Dermatology*. 2021;85(1):71-78.
